# Supplementary material for: Neuropeptide Diversity and Evolutionary Patterns in Crustaceans: Insights into Adaptations, Agonism, and Functional Importance in Organs
Source: Research Square preprint supplement (doi:10.21203/rs.3.rs-8566760/v1), 2026-01-29
Supplement: Supplementary file 1 [file 346428241b035398625f1c12.docx]

**Additional Information File**

**Neuropeptide Diversity and Evolutionary Patterns in Crustaceans: Insights into Adaptations, Agonism, and Functional Importance in Organs**

(submitted to *BMC Genomics*)

Terance Ho Him Wonga, Lai Him Chowa, Tom Kwok Lun Huia, Ka Yan Mab, Ling Ming Tsanga, Ricky Wai Tak Leungc, Jing Qind

aSimon F.S. Li Marine Science Laboratory, School of Life Sciences, The Chinese University of Hong Kong, Shatin, Hong Kong SAR, China

bSchool of Ecology (Shenzhen), Shenzhen Campus of Sun Yat-sen University, Shenzhen, Guangdong 518000, China

cDivision of Science, Engineering and Health Studies, College of Professional and Continuing Education, The Hong Kong Polytechnic University, Hong Kong SAR, China

dSchool of Pharmaceutical Sciences (Shenzhen), Shenzhen Campus of Sun Yat-sen University, Shenzhen, Guangdong 518107, China

Co-correspondence: qinj29@mail.sysu.edu.cn (J. Qin), [ricky.leung@cpce-polyu.edu.hk](mailto:ricky.leung@cpce-polyu.edu.hk) (R.W.T. Leung)

**Table S1** List of crustacean transcriptomic data downloaded from NCBI SRA and TSA databases

| **Species** | **Transcriptome sources**  **(TSA/SRA database)** | **BioProject(s) accession** |
| --- | --- | --- |
| *Acanthogammarus godlewskii* | TSA: GEPE01 | PRJNA321360 |
| *Amphibalanus amphitrite* | SRA: SRS291871, SRS666847, SRS830362 | SRP010923, PRJNA256251, PRJNA271096 |
| *Anatolikos japonicus* | SRA: SRS4437869 | PRJNA524231 |
| *Antecaridina lauensis* | SRA: SRS593244 | PRJNA244748 |
| *Argulus siamensis* | SRA: SRS336177 | PRJNA167720 |
| *Armadillidium nasatum* | SRA: SRS625834, SRS625836 | PRJNA249058 |
| *Armadillidium vulgare* | SRA: SRS625835, SRS625837, SRS625838, SRS625839, SRS625840, SRS625841, SRS625842, SRS625843, SRS625844, SRS625845 | PRJNA249058 |
| *Artemia franciscana* | SRA: SRS625846, SRS625847, SRS625848, SRS625849, SRS625850, SRS625851, SRS625852, SRS625853, SRS625854, SRS625855 | PRJNA249058 |
| *Artemia salina* | SRA: SRS625856, SRS625857 | PRJNA249058 |
| *Artemia sinica* | SRA: SRS625858, SRS625860 | PRJNA249058 |
| *Artemia tibetiana* | SRA: SRS625859, SRS625861 | PRJNA249058 |
| *Asellus aquaticus* | TSA: GDKY01 | PRJNA270761 |
| *Asprogammarus rhodophthalmus* | TSA: GEPK01 | PRJNA321360 |
| *Astacus astacus* | SRA: SRS1180519; TSA: GEDF01 | PRJNA302843 |
| *Astacus leptodactylus* | SRA: SRS379018, SRS595869;  TSA: GAFS01, GAFY01, GBEI01 | PRJNA183420 |
| *Baikalogammarus pullus* | TSA: GEPI01 | PRJNA321360 |
| *Boeckaxelia carpenterii* | TSA: GEPG01 | PRJNA321360 |
| *Boeckaxelia potanini* | TSA: GEPH01 | PRJNA321360 |
| *Brachyuropus grewingkii* | TSA: GEPD01 | PRJNA321360 |
| *Brandtia latissima* | TSA: GEPJ01 | PRJNA321360 |
|  |  |  |
| **Table S1 Cont’d** |  |  |
| *Calanus finmarchicus* | SRA: SRS513847, SRS540321, SRS540324, SRS540325, SRS540326, SRS544012, SRS544013, SRS544014, SRS544015, SRS544016, SRS544017;  TSA: GAXK01, GBFB01, GBXU01 | PRJNA231164,  PRJNA236528,  PRJNA236983 |
| *Calanus glacialis* | TSA: GBXT01 | PRJNA237014 |
| *Calanus sinicus* | SRA: SRS498118 | PRJNA225989 |
| *Calappa philargius* | SRA: SRS4437878 | PRJNA524231 |
| *Calcinus laevimanus* | SRA: SRS4437870 | PRJNA524231 |
| *Caligus rogercresseyi* | SRA: SRS528966, SRS591049, SRS591051, SRS591071, SRS591072, SRS591073, SRS591074, SRS591326, SRS834973;  TSA: GAZX01 | PRJNA234316 |
| *Callinectes sapidus* | SRA: SRS1021261, SRS1021283, SRS1025572; TSA: GEID01 | PRJNA283615,  PRJNA315576 |
| *Callinectes similis* | SRA: SRS1021181 | PRJNA283615 |
| *Cancer borealis* | TSA: GEFB01 | PRJNA310325 |
| *Carcinus aestuarii* | SRA: SRS625882, SRS625883 | PRJNA249058 |
| *Carcinus maenas* | SRA: SRS693679, SRS698586, SRS709376, SRS711835, SRS721713, SRS731920, SRS731923, SRS731924, SRS731925, SRS731926, SRS731928, SRS731929;  TSA: GBXE01 | PRJNA255867 |
| *Caridina rubella* | SRA: SRS593860 | PRJNA244748 |
| *Carinoplax longimana* | SRA: SRS4437875 | PRJNA524231 |
| *Carinurus bicarinatus* | TSA: GEPL01 | PRJNA321360 |
| *Cherax cainii* | SRA: SRS852448 | PRJNA275165 |
| *Cherax destructor* | SRA: SRS846074 | PRJNA275038 |
| *Coenobita clypeatus* | SRA: ERS421805 | PRJEB5838 |
| *Coenobita* sp. | SRA: ERS223743 | PRJEB1673 |
| *Cornugammarus maximus* | TSA: GEPF01 | PRJNA321360 |
| *Crypturopus inflatus* | TSA: GEPM01 | PRJNA321360 |
|  |  |  |
| **Table S1 Cont’d** |  |  |
| *Daphnia magna* | SRA: ERS785242, ERS785243, ERS785244, ERS785245, ERS785246, ERS785247, ERS785248, ERS785249, ERS785250, ERS785251, ERS785252, ERS785253, ERS785254, ERS785255, ERS785256, ERS785257, ERS785258, ERS785259, ERS785260, ERS785261, ERS785262, ERS785263, ERS785264, ERS785265, ERS785266, ERS785267, ERS785268, ERS785269, ERS785270, ERS785271, ERS785272, ERS785273, ERS785274, ERS785275, ERS785276, ERS785277, ERS785278, ERS785279, ERS785280, ERS785281, ERS785282, ERS785283, ERS785284, ERS785285, ERS785286, ERS785287, ERS785288, ERS785289, ERS785290, ERS785291, SRS685309, SRS685322, SRS685338;  TSA: GDIP01, GDIQ01 | PRJNA258118,  PRJEB9781,  PRJNA284518 |
| *Daphnia pulex* | SRA: DRS019240, DRS019241, DRS019242, DRS019243, DRS019244, DRS019245, DRS019246, DRS019247, DRS019248, DRS019249, DRS019250, DRS019251, DRS019252, DRS019253, DRS019254, DRS019255, DRS019256, DRS019257, SRS1052473, SRS969946, SRS969947 | PRJDB3265,  PRJNA287609,  PRJNA241046 |
| *Dorogostaiskia parasitica* | TSA: GERM01 | PRJNA321360 |
| *Echinogammarus veneris* | SRA: SRS515655; TSA: GARO01 | PRJNA231234,  PRJNA231037 |
| *Echiuropus macronychus* | TSA: GEPN01 | PRJNA321360 |
| *Erimacrus isenbeckii* | SRA: SRS4437877 | PRJNA524231 |
|  |  |  |
|  |  |  |
|  |  |  |
|  |  |  |
|  |  |  |
| **Table S1 Cont’d** |  |  |
| *Eriocheir sinensis* | SRA: ERR336998, SRR1555734, SRR1576649, SRR1735503, SRR1735536, SRR1735537, SRR2073826, SRR2170964, SRR2170970, SRR2180019, SRR2180020, SRR3623083, SRR3623084, SRR3623085, SRR3623086, SRR3623087, SRR3623088, SRR3623089, SRR3623090, SRR546086, SRR579529, SRR579530, SRR579531, SRR579532;  TSA: GBUF01, GBZW01, GEFT01, GFBL01 | PRJNA259036,  PRJNA271233,  PRJNA287297,  PRJNA293485,  PRJNA319468,  PRJNA170962,  PRJNA80779,  PRJNA264349,  PRJNA310144,  PRJNA319468 |
| *Eriphia smithii* | SRA: SRS4437880 | PRJNA524231 |
| *Eucarinogammarus wagii* | TSA: GEPO01 | PRJNA321360 |
| *Eucyclops serrulatus* | SRA: SRS515654; TSA: GARW01 | PRJNA231234 |
| *Eulimnogammarus cruentus* | TSA: GEPW01, GEPX01 | PRJNA321360 |
| *Eulimnogammarus cyaneus* | TSA: GEPS01 | PRJNA321360 |
| *Eulimnogammarus czerskii* | TSA: GEPY01 | PRJNA321360 |
| *Eulimnogammarus marituji* | TSA: GEPT01 | PRJNA321360 |
| *Eulimnogammarus messerschmidtii* | TSA: GEPZ01 | PRJNA321360 |
| *Eulimnogammarus similis* | TSA: GEPQ01 | PRJNA321360 |
| *Eulimnogammarus* sp. gam16.4 | TSA: GEQB01 | PRJNA321360 |
| *Eulimnogammarus* sp. gam2quest | TSA: GEQA01 | PRJNA321360 |
| *Eulimnogammarus testaceus* | TSA: GERC01 | PRJNA321360 |
| *Eulimnogammarus ussolzewii* | TSA: GESQ01 | PRJNA321360 |
| *Eulimnogammaru verrucosus* | TSA: GEQC01 | PRJNA321360 |
| *Eulimnogammarus violaceus* | TSA: GESR01 | PRJNA321360 |
| *Eulimnogammarus viridulus* | TSA: GEPU01 | PRJNA321360 |
| *Eulimnogammarus vittatus* | TSA: GEPV01 | PRJNA321360 |
| *Euphausia crystallorophias* | SRA: ERS239125 | PRJEB1836 |
| *Eurytemora affinis* | SRA: SRS618696, SRS620067, SRS620266, SRS620267, SRS865602, SRS865603, SRS865604;  TSA: GBGO01, GEAN01 | PRJNA242763,  PRJNA275666,  PRJNA278152 |
| **Table S1 Cont’d** |  |  |
| *Farfantepenaeus aztecus* | TSA: GEUA01 | PRJNA326516 |
| *Fenneropenaeus merguiensis* | SRA: SRS817710 | PRJNA267611 |
| *Gammarus chevreuxi* | TSA: GFCV01 | PRJNA357029 |
| *Gammarus fossarum* | SRA: ERS384248 | PRJEB5098 |
| *Gammarus lacustris* | TSA: GERD01 | PRJNA321360 |
| *Garjajewia dershawini* | TSA: GEQD01 | PRJNA321360 |
| *Geothelphusa eucrinodonta* | SRA: SRS4437881 | PRJNA524231 |
| *Gmelinoides fasciatus* | TSA: GEQE01 | PRJNA321360 |
| *Gondogeneia antarctica* | SRA: SRS969900 | PRJNA287849 |
| *Grapsus albolineatus* | SRA: SRS4437879 | PRJNA524231 |
| *Halocaridinides trigonophthalma* | SRA: SRS593865 | PRJNA244748 |
| *Heterogammarus sophianosii* | TSA: GEPR01 | PRJNA321360 |
| *Homalogammarus brandtii* | TSA: GERE01 | PRJNA321360 |
| *Hyalella azteca* | TSA: GAJP01, GAJQ01, GEHV01 | PRJNA188322,  PRJNA312414 |
| *Hyalellopsis carinata* | TSA: GEQF01 | PRJNA321360 |
| *Hyalellopsis costata* | TSA: GEQG01 | PRJNA321360 |
| *Hyalellopsis grisea* | TSA: GEQH01 | PRJNA321360 |
| *Hyalellopsis setosa* | TSA: GEQI01 | PRJNA321360 |
| *Hyalellopsis stebbingi* | TSA: GEQJ01 | PRJNA321360 |
| *Hyas araneus* | SRA: ERS206247, ERS206248, ERS206249, ERS206250, ERS206251, ERS206252 | PRJEB1298 |
| *Lepeophtheirus salmonis* | SRA: ERS237607 | PRJEB1804 |
| *Leptodius* sp. | SRA: SRS4437876 | PRJNA524231 |
| *Lernaea cyprinacea* | SRA: SRS518952, SRS533731 | PRJNA232511 |
| Leucosiidae sp. | SRA: SRS18013895 | PRJNA977262 |
| *Linevichella vortex* | TSA: GERH01 | PRJNA321360 |
| *Liocarcinus depurator* | SRA: SRS626025, SRS626026 | PRJNA249058 |
|  |  |  |
|  |  |  |
|  |  |  |
| **Table S1 Cont’d** |  |  |
| *Litopenaeus vannamei* | SRA: ERS324054, SRS1145819, SRS265043, SRS387177, SRS418271, SRS418276, SRS418409, SRS418410, SRS418412, SRS507862, SRS528241, SRS566372, SRS638274, SRS646105, SRS646107, SRS646108, SRS646115, SRS646116, SRS685741, SRS719752, SRS727540, SRS892508, SRS892509, SRS892510, SRS892511, SRS954258, SRS954259, SRS954260, SRS954261, SRS993292, SRS993293, SRS993295, SRS993296, SRS993297, SRS993298, SRS993299;  TSA: GCVY01, GDTK01, GDUV01, GETD01, GETZ01 | PRJEB4317,  PRJNA200996, PRJNA229518, PRJNA252793, PRJNA263534, PRJNA255337, PRJNA285934, PRJNA288849, PRJNA73443, PRJNA234078, PRJNA240270, PRJNA253518, PRJNA258359, PRJNA187037,  PRJNA77889,  PRJNA293148,  PRJNA323362 |
| *Lydia annulipes* | SRA: SRS4437864 | PRJNA524231 |
| *Macrobrachium nipponense* | SRA: SRS879488, SRS879490, SRS879491, SRS879492, SRS879493, SRS879495;  TSA: GCVG01 | PRJNA278700 |
| *Macrobrachium rosenbergii* | SRA: DRS016742, DRS016743, SRS257953, SRS264277, SRS264278, SRS264279, SRS365108, SRS365109, SRS365110, SRS365111, SRS365112, SRS365113, SRS365114, SRS365115, SRS441445, SRS441446, SRS441448, SRS441449, SRS441450, SRS441452, SRS441453, SRS540866, SRS690457, SRS690466, SRS690467, SRS690468, SRS744908, SRS744909, SRS744910 | PRJDB3040,  PRJNA174197,  PRJNA259571,  PRJNA267466,  PRJNA72407 |
| *Macrohectopus branickii* | TSA: GEQK01 | PRJNA321360 |
| *Macropereiopus parvus* | TSA: GEQM01 | PRJNA321360 |
| *Macropereiopus wagneri* | TSA: GEQL01 | PRJNA321360 |
| Majidae sp. | SRA: SRS4298863 | PRJNA517457 |
| *Megabalanus volcano* | Ma et al., 2017 | PRJNA356793 |
| *Meganyctiphanes norvegica* | TSA: GETT01 | PRJNA324094 |
| *Melita plumulosa* | TSA: GAKD01 | PRJNA200979 |
| *Metabetaeus lohena* | SRA: SRS593883 | PRJNA244748 |
| **Table S1 Cont’d** |  |  |
| *Metabetaeus minutus* | SRA: SRS593884 | PRJNA244748 |
| *Micruropus glaber* | TSA: GEQN01 | PRJNA321360 |
| *Micruropus parvulus* | TSA: GEQO01 | PRJNA321360 |
| *Micruropus wahlii* | TSA: GEQP01 | PRJNA321360 |
| *Necora puber* | SRA: SRS626074, SRS626075, SRS626076, SRS626077, SRS626078, SRS626079, SRS626080, SRS626081 | PRJNA249058 |
| *Neocaridina denticulata* | SRA: SRS567181 | PRJNA240382 |
| *Neomysis awatschensis* | TSA: GDFV01 | PRJNA287057 |
| *Nephrops norvegicus* | SRA: SRS1067162 | PRJNA293452 |
| *Ocypode ceratophthalmus* | SRA: SRS4437868 | PRJNA524231 |
| *Odontogammarus calcaratus* | TSA: GEQQ01 | PRJNA321360 |
| *Ommatogammarus albinus* | TSA: GEQR01 | PRJNA321360 |
| *Ommatogammarus flavus* | TSA: GEQS01 | PRJNA321360 |
| *Ovalipes punctatus* | SRA: SRS4437882 | PRJNA524231 |
| *Oxyacanthus curtus* | TSA: GEPA01 | PRJNA321360 |
| *Oxyacanthus flavus* | TSA: GEPB01 | PRJNA321360 |
| *Oxyacanthus sowinskii* | TSA: GEPC01 | PRJNA321360 |
| *Ozius rugulosus* | SRA: SRS4437865 | PRJNA524231 |
| *Pachyschesis branchialis* | TSA: GEQT01, GEQU01 | PRJNA321360 |
| *Pacifastacus leniusculus* | TSA: GBYW01 | PRJNA259594 |
| *Pagurus bernhardus* | SRA: ERS223745 | PRJEB1673 |
| *Palaemon argentinus* | TSA: GEFN01 | PRJNA309860 |
| *Palaemon carinicauda* | SRA: SRS528196 | PRJNA233983 |
| *Palicarinus puzyllii* | TSA: GEQW01 | PRJNA321360 |
| *Pallasea cancelloides* | TSA: GEQX01, GERF01 | PRJNA321360 |
| *Pallasea cancellus* | TSA: GERI01 | PRJNA321360 |
| *Pallasea grubei* | TSA: GERJ01 | PRJNA321360 |
| *Pallasea* sp. gam7.3 | TSA: GEQZ01 | PRJNA321360 |
| *Pallaseopsis kessleri* | TSA: GEQY01 | PRJNA321360 |
| *Pandalus latirostris* | SRA: DRS000703 | PRJDA66833 |
| *Pandorites podoceroides* | TSA: GERA01 | PRJNA321360 |
| **Table S1 Cont’d** |  |  |
| *Panulirus ornatus* | SRA: SRS5309376, SRS5309377, SRS5309378, SRS5309379, SRS5309381 | PRJNA562428 |
| *Paracyclopina nana* | SRA: SRS753882; TSA: GCJT01 | PRJNA268783 |
| *Parapallasea borowskii* | TSA: GERK01 | PRJNA321360 |
| *Parapallasea wosnessenskii* | TSA: GERB01 | PRJNA321360 |
| *Parasesarma pictum* | SRA: SRS4437872 | PRJNA524231 |
| *Penaeus monodon* | SRA: SRS1113500, SRS1113515, SRS1113516, SRS1113517, SRS281904, SRS281905, SRS281907;  TSA: GEEP01, GEME01, GFCA01 | PRJNA298507,  PRJNA77663,  PRJNA267515,  PRJNA321953 |
| *Pentagonurus dawydowi* | TSA: GEQV01 | PRJNA321360 |
| *Petrolisthes lamarckii* | SRA: SRS4437874 | PRJNA524231 |
| Pinnotheridaesp. | SRA: SRS11069703 | PRJNA778029 |
| *Plagusia squamosa* | SRA: SRS4437873 | PRJNA524231 |
| *Poekilogammarus pictoides* | TSA: GERL01 | PRJNA321360 |
| *Portunus trituberculatus* | SRA: SRS386240, SRS492002, SRS528243, SRS731327, SRS735219 | PRJNA223209,  PRJNA264373,  PRJNA266070,  PRJNA186652,  PRJNA234094 |
| *Procambarus clarkii* | SRA: SRS431092, SRS599067, SRS654768, SRS654769, SRS655516;  TSA: GARH01, GBEV01 | PRJNA205889,  PRJNA248057 |
| *Pseudocalanus acuspes* | SRA: SRS1078724, SRS1078729, SRS1078730, SRS1078731, SRS1078732, SRS1078733, SRS1078734, SRS1078757, SRS1078758, SRS1078759, SRS1078760, SRS1078762, SRS1078763, SRS1078764 | PRJNA296544 |
| *Ranina ranina* | SRA: SRS4437862 | PRJNA524231 |
| *Sagmariasus verreauxi* | SRA: SRS856121 | PRJNA229523 |
| *Scylla olivacea* | SRA: SRS1051042, SRS1067035, SRS1073192; TSA: GDRN01 | PRJNA289610 |
| **Table S1 Cont’d** |  |  |
| *Scylla paramamosain* | SRA: SRS353398, SRS353399, SRS582375;  TSA: GEUT01 | PRJNA242586,  PRJNA328554, PRJNA172062 |
| *Sluginella kietlinskii* | TSA: GEPP01 | PRJNA321360 |
| *Talitrus saltator* | SRA: SRS1098330; TSA: GDUJ01 | PRJNA297565 |
| *Tetraclita japonica* | SRA: SRS292176 | SRP010923 |
| *Tetraclita squamosa* | Ma et al., 2017 | PRJNA1011947 |
| *Tigriopus californicus* | SRA: SRS1187953, SRS1187954, SRS1187955, SRS1187956, SRS1187961, SRS1187962, SRS344515, SRS344516, SRS344517, SRS344518, SRS722729, SRS722730, SRS722732, SRS722739, SRS722740, SRS722741, SRS722742, SRS729785, SRS729786, SRS729787, SRS729788, SRS729789, SRS729790, SRS729791, SRS729792, SRS729793;  TSA: GBSZ01, GBTC01 | PRJNA263967,  PRJNA264820,  PRJNA304270,  PRJNA168170 |
| *Tigriopus japonicus* | TSA: GCHA01 | PRJNA274317 |
| *Tigriopus kingsejongensis* | TSA: GDFW01 | PRJNA283925 |
| *Triops newberryi* | TSA: GEHY01 | PRJNA315010 |
| *Tymolus uncifer* | SRA: SRS4437863 | PRJNA524231 |
| *Xenograpsus testudinatus* | SRA: SRS4437866 | PRJNA524231 |
| *Xibalbanus tulumensis* | TSA: GAJM01 | PRJNA203251 |

**Table S2** Pan-crustacean sources of the downloaded neuropeptide sequences used to construct 66 neuropeptide family hidden Markov models (HMMs)

| **Neuropeptide family** | **Abbreviation** | **Number of crustacean amino acid sequences downloaded** | **Number of crustacean species** | **Number of insect amino acid sequences downloaded** | **Number of insect species** |
| --- | --- | --- | --- | --- | --- |
| Adipokinetic hormone | AKH | 8 | 8 | 484 | 385 |
| Adipokinetic hormone/Corazonin-related peptide | ACP | 8 | 8 | 38 | 33 |
| Agatoxin-like peptide | / | 20 | 7 | 0 | 0 |
| Allatostatin A | AstA | 8 | 8 | 335 | 43 |
| Allatostatin B | AstB | 9 | 8 | 256 | 37 |
| Allatostatin C | AstC | 8 | 7 | 52 | 39 |
| Allatostatin CC | AstCC | 7 | 7 | 38 | 35 |
| Allatostatin CCC | AstCCC | 7 | 7 | 4 | 4 |
| Allatotropin | AT | 0 | 0 | 43 | 36 |
| Anti-diuretic factor | ADF | 0 | 0 | 5 | 1 |
| Bursicon | Burs | 15 | 8 | 60 | 35 |
| Calcitonin | Cal | 12 | 6 | 11 | 4 |
| Capability | CAPA | 0 | 0 | 347 | 128 |
| CCHamide | CCHa | 16 | 8 | 67 | 38 |
| CCRFamide | / | 6 | 6 | 0 | 0 |
| CNMamide | / | 11 | 7 | 0 | 0 |
| Corazonin | Crz | 9 | 8 | 142 | 138 |
| Corticotropin-releasing factor-like diuretic hormone | CRF-like diuretic hormone | 8 | 8 | 0 | 0 |
| Crustacean cardioactive peptide | CCAP | 7 | 7 | 39 | 38 |
| Crustacean female sex hormone | / | 15 | 5 | 0 | 0 |
|  |  |  |  |  |  |
| **Table S2 Cont’d** |  |  |  |  |  |
| Crustacean hyperglycemic hormone | CHH | 26 | 12 | 0 | 0 |
| Crustacean hyperglycemic hormone-molt-inhibiting hormone-like | CHH-MIH-like | 4 | 3 | 0 | 0 |
| Diuretic hormone 31 | DH31 | 8 | 8 | 110 | 110 |
| Diuretic hormone 44 | DH44 | 0 | 0 | 89 | 75 |
| Ecdysis-triggering hormone | ETH | 9 | 7 | 54 | 33 |
| Eclosion hormone | EH | 14 | 8 | 53 | 36 |
| EFLamide | / | 9 | 7 | 0 | 0 |
| Elevenin | Ele | 8 | 8 | 23 | 17 |
| Elongated pigment-dispersing hormone | / | 7 | 7 | 0 | 0 |
| FMRFamide | FMRFa | 7 | 7 | 275 | 47 |
| Glycoprotein-A | / | 8 | 8 | 0 | 0 |
| Glycoprotein-B | / | 7 | 7 | 0 | 0 |
| Glycoprotein-hormone alpha 2 | GPA2 | 0 | 0 | 14 | 14 |
| Glycoprotein-hormone beta 5 | GPB5 | 0 | 0 | 15 | 14 |
| Gonadotropin-releasing hormone | GnRH | 6 | 6 | 0 | 0 |
| Hyrg | / | 7 | 7 | 0 | 0 |
| Insulin-like peptide | ILP | 13 | 8 | 228 | 18 |
| Ion transport peptide | ITP | 35 | 11 | 82 | 39 |
| Kinin | K | 10 | 8 | 227 | 66 |
| Limostatin | Lst | 0 | 0 | 6 | 5 |
| Molt-inhibiting hormone | / | 23 | 11 | 0 | 0 |
| Myosuppressin | MS | 8 | 8 | 47 | 46 |
| Natalisin | NTL | 8 | 8 | 143 | 29 |
| Neuroparsin | NP | 34 | 10 | 15 | 14 |
| **Table S2 Cont’d** |  |  |  |  |  |
| Neuropeptide F | NPF | 22 | 8 | 79 | 39 |
| Neuropeptide-like precursor | NPLP | 6 | 6 | 128 | 18 |
| Orcokinin | OK | 9 | 8 | 306 | 42 |
| Partner of bursicon | Pburs | 0 | 0 | 11 | 11 |
| Periviscerokinin | / | 6 | 6 | 0 | 0 |
| Pheromone biosynthesis- activating neuropeptide | PBAN | 0 | 0 | 45 | 40 |
| Pheromone biosynthesis- activating neuropeptide-Diapause hormone | PBAN-DH | 0 | 0 | 34 | 34 |
| Pigment-dispersing factor | PDF | 20 | 8 | 33 | 29 |
| Proctolin | Proc | 8 | 8 | 32 | 31 |
| Prothoracicotropic hormone | PTTH | 0 | 0 | 15 | 14 |
| Pyrokinin | PK | 10 | 8 | 394 | 145 |
| Red pigment-concentrating hormone | RPCH | 4 | 4 | 0 | 0 |
| Relaxin | / | 6 | 6 | 0 | 0 |
| RYamide | RYa | 8 | 8 | 74 | 34 |
| Short neuropeptide F | sNPF | 8 | 8 | 74 | 41 |
| SIFamide | SIFa | 8 | 8 | 50 | 44 |
| Sulfakinin | SK | 8 | 8 | 193 | 109 |
| Tachykinin-related peptide | TRP | 8 | 8 | 183 | 36 |
| Trissin | Tris | 8 | 8 | 50 | 30 |
| Tryptopyrokinin | tPK | 0 | 0 | 12 | 1 |
| Vasopressin-like peptide | VPL | 7 | 7 | 15 | 15 |
| Vasopressin-neurophysin | / | 3 | 3 | 1 | 1 |

**Table S3** The 58 crustacean species from four classes (Branchiopoda, Thecostraca, Hexanauplia, and Malacostraca) remained after filtering and their organ sources

| **Crustacean class** | **Agonism of malacostracans**a | **Species** | **Organ sources**c |
| --- | --- | --- | --- |
| **Branchiopoda** | N/A | *Daphnia magna*b | Whole body |
|  | N/A | *Daphnia pulex*b | Whole body |
| **Thecostraca** | N/A | *Amphibalanus amphitrite*b | Whole body |
|  | N/A | *Megabalanus volcano*b | Whole body |
|  | N/A | *Tetraclita squamosa*b | Whole body |
| **Hexanauplia** | N/A | *Caligus rogercresseyi*b | Whole body |
|  | N/A | *Lepeophtheirus salmonis*b | Whole body |
|  | N/A | *Tigriopus japonicus*b | Whole body |
|  | N/A | *Tigriopus californicus*b | Whole body |
|  | N/A | *Paracyclopina nana*b | Whole body |
|  | N/A | *Eucyclops serrulatus*b | Whole body |
|  | N/A | *Lernaea cyprinacea*b | Whole body |
|  | N/A | *Eurytemora affinis*b | Whole body |
|  | N/A | *Calanus finmarchicus*b | Whole body |
|  | N/A | *Calanus sinicus*b | Whole body |
| **Malacostraca** | **Non-agonistic** | *Talitrus saltator*b | CNS |
|  |  | *Hyalella azteca*b | Whole body |
|  |  | *Gammarus fossarum*b | Antennae, antennules, CNS, eyes, hepatopancreases, testes, ovaries |
|  |  | *Echinogammarus veneris*b | Whole body |
|  |  | *Meganyctiphanes norvegica*b | Muscle |
|  |  | *Euphausia crystallorophias*b | Eyestalks |
|  |  | *Penaeus monodon*b | CNS, eyestalks, hepatopancreases, gill, testes, ovaries, muscle, heart |
|  |  | *Litopenaeus vannamei*b | Antennae, antennules, CNS, eyestalks, hepatopancreases, gill, testes, ovaries, hemolymph, muscle |
|  |  | *Rhynchocinetes durbanensis* | Antennae, antennules, CNS, eyestalks |
|  |  | *Palaemon carinicauda*b | Antennae, antennules, CNS, eyestalks |
|  |  | *Neocaridina denticulata*b | Whole body |
| **Table S3 Cont’d** | | | |
|  |  | *Parribacus japonicus* | Antennae, antennules, CNS, eyestalks |
|  |  | *Scyllarides squammosus* | Antennae, antennules, CNS, eyestalks |
|  | **Agonistic** | *Eriocheir sinensis*b | Whole body |
|  |  | *Gecarcinus nobilii* | Antennae, antennules, CNS, eyestalks |
|  |  | *Paraleptuca splendida* | CNS, eyestalks |
|  |  | *Portunus trituberculatus*b | Eyestalks, hepatopancreases, gill, muscle, ovaries, heart, testes, hemolymph |
|  |  | *Portunus pelagicus* | Antennae, antennules, CNS, eyestalks |
|  |  | *Scylla olivacea*b | Testes |
|  |  | *Carcinus maenas*b | CNS, eyestalks, gill, hepatopancreases, hemolymph, muscle, heart, testes, ovaries, eggs |
|  |  | *Menippe rumphii* | Antennae, antennules, CNS, eyestalks |
|  |  | *Sommaniathelphusa sinensis* | Antennae, antennules, CNS, eyestalks |
|  |  | *Naihaipotamon hongkongense* | Antennae, antennules, CNS, eyestalks |
|  |  | *Neopetrolisthes maculatus* | Antennae, antennules, CNS, eyestalks |
|  |  | *Panulirus ornatus*b | Eyestalks, gill, muscle, hepatopancreases, ovaries |
|  |  | *Panulirus cygnus* | Antennae, antennules, CNS, eyestalks |
|  |  | *Enoplometopus antillensis* | Antennae, antennules, CNS, eyestalks |
|  |  | *Nephrops norvegicus*b | Eyestalks |
|  |  | *Homarus americanus* | Antennae, antennules, CNS, eyestalks |
|  |  | *Cherax quadricarinatus* | Antennae, antennules, CNS, eyestalks |
|  |  | *Astacus leptodactylus*b | Hepatopancreases, gill, muscle, hemolymph |
|  |  | *Astacus astacus*b | Hepatopancreases, ovaries, antennal gland, muscle |
|  |  | *Procambarus virginalis* | Antennae, antennules, CNS, eyestalks |
|  |  | *Procambarus clarkii*b | CNS, eyestalks, hemolymph, gill, testes, ovaries, hepatopancreases, heart, antennal gland, muscle |
|  |  | *Stenopus cyanoscelis* | Antennae, antennules, CNS, eyestalks |
|  |  | *Stenopus hispidus* | Antennae, antennules, CNS, eyestalks |
|  |  | *Lysmata amboinensis* | Antennae, antennules, CNS, eyestalks |
|  |  | *Alpheus sp.* | Antennae, antennules, CNS, eyestalks |
|  |  | *Cuapetes platycheles* | Antennae, antennules, CNS, eyestalks |
| **Table S3 Cont’d** | | | |
|  |  | *Macrobrachium laevis* | Antennae, antennules, CNS, eyestalks |
|  |  | *Macrobrachium rosenbergii*b | Whole body |
|  |  | *Lysiosquillina maculata* | Antennae, antennules, CNS, eyestalks |
|  |  | *Odontodactylus scyllarus* | Antennae, antennules, CNS, eyestalks |

a: N/A = Not applicable. See Table S4 for the basis behind the classification of the 43 malacostracans into non-agonistic and agonistic groups. b: Species downloaded from NCBI SRA and/or TSA databases; see Table S1 for the details. c: CNS = Central nervous system

**Table S4** Classifying 43 malacostracan crustacean species into non-agonistic and agonistic group based on literature and/or observation

|  | **Order** | **Infraorder** | **Superfamily** | **Family** | **Species** | **Reason (literature and/or observation)**a | **Reference(s) for the literature**b |
| --- | --- | --- | --- | --- | --- | --- | --- |
| **Non-agonistic group (13 species)** | **Amphipoda** | **Gammarida** | Gammaroidea | Gammaridae | *Echinogammarus veneris* | O | N/A |
| *Gammarus fossarum* |  |
| **Talitrida** | Hyaloidea | Hyalellidae | *Hyalella azteca* |  |
| Talitroidea | Talitridae | *Talitrus saltator* |  |
| **Decapoda** | **Achelata** |  | Scyllaridae | *Parribacus japonicus* |  |
| *Scyllarides squammosus* |  |
| **Caridea** | Atyoidea | Atyidae | *Neocaridina denticulata* |  |
| Nematocarcinoidea | Rhynchocinetidae | *Rhynchocinetes durbanensis* |  |
| Palaemonoidea | Palaemonidae | *Palaemon carinicauda* |  |
| **Dendrobranchiata** | Penaeoidea | Penaeidae | *Litopenaeus vannamei* |  |
| *Penaeus monodon* |  |
| **Euphausiacea** |  | | Euphausiidae | *Euphausia crystallorophias* |  |
| *Meganyctiphanes norvegica* |  |
| **Agonistic group (30 species)** | **Decapoda** | **Achelata** |  | Palinuridae | *Panulirus cygnus* | L and O | Carter et al., 2014 |
|  |  |  | *Panulirus ornatus* | L and O | Kelly et al., 2022;  Foo, 2023 |
|  |  | **Anomura** | Galatheoidea | Porcellanidae | *Neopetrolisthes maculatus* | O | N/A |
|  |  | **Astacidea** | Astacoidea | Astacidae | *Astacus astacus* | L | Maiwald et al., 2006; Roessink et al., 2022 |
|  |  |  |  | *Astacus leptodactylus* | L | Harlıoğlu et al., 2014 |
|  |  |  |  | Cambaridae | *Procambarus clarkii* | L and O | Delgado-Morales et al., 2004; Horner et al., 2008 |
|  |  |  |  |  | *Procambarus virginalis* | L and O | Hossain et al., 2020 |
|  |  |  | Enoplometopoidea | Enoplometopidae | *Enoplometopus antillensis* | L and O | Rhyne et al., 2017 |
|  |  |  |  |  |  |  |  |
|  |  |  |  |  |  |  |  |
| **Table S4 Cont’d** |  |  |  |  |  |  |  |
|  |  |  | Nephropoidea | Nephropidae | *Homarus americanus* | L and O | Atema and Voigt, 1995; Huber and Kravitz, 1995 |
|  |  |  | *Nephrops norvegicus* | L | Katoh et al., 2008; Sbragaglia et al., 2017 |
|  |  |  | Parastacoidea | Parastacidae | *Cherax quadricarinatus* | L and O | Karplus et al., 2003; King et al., 2022 |
|  |  | **Brachyura** | Eriphioidea | Menippidae | *Menippe rumphii* | L and O | Vermeij, 1973 |
|  |  | Gecarcinucoidea | Gecarcinucidae | *Somanniathelphusa sinensis* | L and O | Ng, 2017 |
|  |  | Grapsoidea | Gecarcinidae | *Gecarcinus nobilii* | L and O | Wright, 1968 |
|  |  | Varunidae | *Eriocheir sinensis* | L and O | Yang et al., 2019; Li et al., 2019 |
|  |  | Ocypodoidea | Ocypodidae | *Paraleptuca splendida* | L and O | Crane, 1966 |
|  |  | Portunoidea | Carcinidae | *Carcinus maenas* | L | Sneddon et al., 1997 |
|  |  | Portunidae | *Portunus pelagicus* | L and O | Marshall et al., 2005 |
|  |  | *Portunus trituberculatus* | L | Zhu et al., 2021 |
|  |  | *Scylla olivacea* | L | Waiho et al., 2015 |
|  |  | Potamoidea | Potamidae | *Nanhaipotamon hongkongense* | L and O | Ng and Dudgeon, 1992 |
|  |  | **Caridea** | Alpheoidea | Alpheidae | *Alpheus* sp. | L and O | Schein, 1975; Herberholz and Schmitz, 1998 |
|  |  | Lysmatidae | *Lysmata amboinensis* | L and O | Fiedler, 2000;  Wong and Michiels, 2011 |
|  |  | Palaemonoidea | Palaemonidae | *Cuapetes platycheles* | O | N/A |
|  |  | *Macrobrachium laevis* | L and O | New, 2002 |
|  |  | *Macrobrachium rosenbergii* | L and O | New, 2002; Barki et al., 1991 |
|  |  | **Stenopodidea** |  | Stenopodidae | *Stenopus cyanoscelis* | L and O | Wong et al., 2024 |
|  |  | *Stenopus hispidus* | L and O | Wong et al., 2024; Johnson, 1969 |
|  |  |  |  |  |  |  |  |
|  |  |  |  |  |  |  |  |
|  |  |  |  |  |  |  |  |
|  | | | | | | | |
| **Table S4 Cont’d** | | | | | | | |
|  | **Stomatopoda** |  | Gonodactyloidea | Odontodactylidae | *Odontodactylus scyllarus* | L and O | Caldwell and Dingle, 1976;  Patek and Caldwell, 2005 |
|  | Lysiosquilloidea | Lysiosquillidae | *Lysiosquillina maculata* | L and O | Yaraghi et al., 2019; Delaunois et al., 2021 |

a: O = Observation in the lab and/or field, L = Literature, b: N/A = not applicable.

**Table S5** Relative abundances of neuropeptide family member numbers for each family across Class Branchiopoda, Thecostraca, Hexanauplia, and Malacostraca

| **Neuropeptide family** | **Crustacean class** | **Relative abundance of neuropeptide family member number (mean ± SD)** | **Number of species** |
| --- | --- | --- | --- |
| **ACP** | Branchiopoda | 0.000 ± 0.000 | 2 |
|  | Thecostraca | 0.000 ± 0.000 | 3 |
|  | Hexanauplia | 0.004350 ± 0.009717 | 10 |
|  | Malacostraca | 0.01415 ± 0.01415 | 43 |
| **ADF** | Branchiopoda | 0.000 ± 0.000 | 2 |
|  | Thecostraca | 0.000 ± 0.000 | 3 |
|  | Hexanauplia | 0.000 ± 0.000 | 10 |
|  | Malacostraca | 0.0002736 ± 0.001794 | 43 |
| **Agatoxin-like peptide** | Branchiopoda | 0.03690 ± 0.007993 | 2 |
|  | Thecostraca | 0.07674 ± 0.01097 | 3 |
|  | Hexanauplia | 0.08859 ± 0.04340 | 10 |
|  | Malacostraca | 0.03011 ± 0.01935 | 43 |
| **AKH** | Branchiopoda | 0.000 ± 0.000 | 2 |
|  | Thecostraca | 0.000 ± 0.000 | 3 |
|  | Hexanauplia | 0.001639 ± 0.005184 | 10 |
|  | Malacostraca | 0.002448 ± 0.006889 | 43 |
| **AstA** | Branchiopoda | 0.04688 ± 0.06629 | 2 |
|  | Thecostraca | 0.1347 ± 0.05888 | 3 |
|  | Hexanauplia | 0.1312 ± 0.1516 | 10 |
|  | Malacostraca | 0.03723 ± 0.03040 | 43 |
| **AstB** | Branchiopoda | 0.000 ± 0.000 | 2 |
|  | Thecostraca | 0.000 ± 0.000 | 3 |
|  | Hexanauplia | 0.000 ± 0.000 | 10 |
|  | Malacostraca | 0.02358 ± 0.01666 | 43 |
|  |  |  |  |
| **Table S5 Cont’d** |  |  |  |
| **AstC** | Branchiopoda | 0.01064 ± 0.01505 | 2 |
|  | Thecostraca | 0.02050 ± 0.02002 | 3 |
|  | Hexanauplia | 0.02180 ± 0.02728 | 10 |
|  | Malacostraca | 0.01487 ± 0.01073 | 43 |
| **AstCC** | Branchiopoda | 0.02344 ± 0.03315 | 2 |
|  | Thecostraca | 0.01075 ± 0.01862 | 3 |
|  | Hexanauplia | 0.02273 ± 0.01421 | 10 |
|  | Malacostraca | 0.01363 ± 0.01087 | 43 |
| **AstCCC** | Branchiopoda | 0.03192 ± 0.04513 | 2 |
|  | Thecostraca | 0.03003 ± 0.009333 | 3 |
|  | Hexanauplia | 0.000 ± 0.000 | 10 |
|  | Malacostraca | 0.01467 ± 0.008375 | 43 |
| **AT** | Branchiopoda | 0.000 ± 0.000 | 2 |
|  | Thecostraca | 0.000 ± 0.000 | 3 |
|  | Hexanauplia | 0.000 ± 0.000 | 10 |
|  | Malacostraca | 0.005067 ± 0.02346 | 43 |
| **Burs** | Branchiopoda | 0.05535 ± 0.01199 | 2 |
|  | Thecostraca | 0.05389 ± 0.01258 | 3 |
|  | Hexanauplia | 0.05817 ± 0.03085 | 10 |
|  | Malacostraca | 0.03136 ± 0.01928 | 43 |
| **Cal** | Branchiopoda | 0.01845 ± 0.003997 | 2 |
|  | Thecostraca | 0.05266 ± 0.02889 | 3 |
|  | Hexanauplia | 0.01084 ± 0.01597 | 10 |
|  | Malacostraca | 0.02603 ± 0.01989 | 43 |
| **CAPA** | Branchiopoda | 0.000 ± 0.000 | 2 |
|  | Thecostraca | 0.000 ± 0.000 | 3 |
|  | Hexanauplia | 0.001493 ± 0.004720 | 10 |
|  | Malacostraca | 0.0006211 ± 0.002960 | 43 |
| **Table S5 Cont’d** |  |  |  |
| **CCAP** | Branchiopoda | 0.000 ± 0.000 | 2 |
|  | Thecostraca | 0.000 ± 0.000 | 3 |
|  | Hexanauplia | 0.000 ± 0.000 | 10 |
|  | Malacostraca | 0.000 ± 0.000 | 43 |
| **CCHa** | Branchiopoda | 0.000 ± 0.000 | 2 |
|  | Thecostraca | 0.000 ± 0.000 | 3 |
|  | Hexanauplia | 0.000 ± 0.000 | 10 |
|  | Malacostraca | 0.02102 ± 0.01425 | 43 |
| **CCRFamide** | Branchiopoda | 0.000 ± 0.000 | 2 |
|  | Thecostraca | 0.003584 ± 0.006208 | 3 |
|  | Hexanauplia | 0.03225 ± 0.02563 | 10 |
|  | Malacostraca | 0.008014 ± 0.007859 | 43 |
| **CHH** | Branchiopoda | 0.000 ± 0.000 | 2 |
|  | Thecostraca | 0.003584 ± 0.006208 | 3 |
|  | Hexanauplia | 0.000 ± 0.000 | 10 |
|  | Malacostraca | 0.02551 ± 0.02584 | 43 |
| **CHH-MIH-like** | Branchiopoda | 0.000 ± 0.000 | 2 |
|  | Thecostraca | 0.000 ± 0.000 | 3 |
|  | Hexanauplia | 0.002159 ± 0.004951 | 10 |
|  | Malacostraca | 0.01512 ± 0.01387 | 43 |
| **CNMamide** | Branchiopoda | 0.03906 ± 0.05524 | 2 |
|  | Thecostraca | 0.000 ± 0.000 | 3 |
|  | Hexanauplia | 0.000 ± 0.000 | 10 |
|  | Malacostraca | 0.01241 ± 0.01126 | 43 |
| **CRF-like diuretic hormone** | Branchiopoda | 0.000 ± 0.000 | 2 |
|  | Thecostraca | 0.000 ± 0.000 | 3 |
|  | Hexanauplia | 0.000 ± 0.000 | 10 |
|  | Malacostraca | 0.01381 ± 0.008531 | 43 |
| **Table S5 Cont’d** |  |  |  |
| **Crustacean female sex hormone** | Branchiopoda | 0.04688 ± 0.06629 | 2 |
|  | Thecostraca | 0.000 ± 0.000 | 3 |
|  | Hexanauplia | 0.005082 ± 0.01049 | 10 |
|  | Malacostraca | 0.03177 ± 0.02116 | 43 |
| **Crz** | Branchiopoda | 0.007813 ± 0.01105 | 2 |
|  | Thecostraca | 0.000 ± 0.000 | 3 |
|  | Hexanauplia | 0.006002 ± 0.01095 | 10 |
|  | Malacostraca | 0.01260 ± 0.01231 | 43 |
| **DH31** | Branchiopoda | 0.03973 ± 0.03409 | 2 |
|  | Thecostraca | 0.06364 ± 0.01427 | 3 |
|  | Hexanauplia | 0.06809 ± 0.04055 | 10 |
|  | Malacostraca | 0.01676 ± 0.01279 | 43 |
| **DH44** | Branchiopoda | 0.02626 ± 0.007052 | 2 |
|  | Thecostraca | 0.05053 ± 0.02653 | 3 |
|  | Hexanauplia | 0.04909 ± 0.04233 | 10 |
|  | Malacostraca | 0.001137 ± 0.004316 | 43 |
| **EFLamide** | Branchiopoda | 0.03690 ± 0.007992 | 2 |
|  | Thecostraca | 0.02409 ± 0.02122 | 3 |
|  | Hexanauplia | 0.09056 ± 0.1103 | 10 |
|  | Malacostraca | 0.02336 ± 0.01856 | 43 |
| **EH** | Branchiopoda | 0.07879 ± 0.02116 | 2 |
|  | Thecostraca | 0.07674 ± 0.01097 | 3 |
|  | Hexanauplia | 0.01273 ± 0.01433 | 10 |
|  | Malacostraca | 0.02118 ± 0.01813 | 43 |
| **Ele** | Branchiopoda | 0.01845 ± 0.003997 | 2 |
|  | Thecostraca | 0.000 ± 0.000 | 3 |
|  | Hexanauplia | 0.03934 ± 0.04006 | 10 |
|  | Malacostraca | 0.01829 ± 0.01929 | 43 |
| **Table S5 Cont’d** |  |  |  |
| **Elongated pigment-dispersing hormone** | Branchiopoda | 0.000 ± 0.000 | 2 |
|  | Thecostraca | 0.009524 ± 0.01650 | 3 |
|  | Hexanauplia | 0.000 ± 0.000 | 10 |
|  | Malacostraca | 0.01796 ± 0.02450 | 43 |
| **ETH** | Branchiopoda | 0.000 ± 0.000 | 2 |
|  | Thecostraca | 0.000 ± 0.000 | 3 |
|  | Hexanauplia | 0.000 ± 0.000 | 10 |
|  | Malacostraca | 0.006082 ± 0.008682 | 43 |
| **FMRFa** | Branchiopoda | 0.000 ± 0.000 | 2 |
|  | Thecostraca | 0.000 ± 0.000 | 3 |
|  | Hexanauplia | 0.002174 ± 0.006874 | 10 |
|  | Malacostraca | 0.005083 ± 0.01562 | 43 |
| **Glycoprotein-A** | Branchiopoda | 0.01845 ± 0.003996 | 2 |
|  | Thecostraca | 0.01669 ± 0.01488 | 3 |
|  | Hexanauplia | 0.000 ± 0.000 | 10 |
|  | Malacostraca | 0.01251 ± 0.01215 | 43 |
| **Glycoprotein-B** | Branchiopoda | 0.02626 ± 0.007052 | 2 |
|  | Thecostraca | 0.007168 ± 0.01242 | 3 |
|  | Hexanauplia | 0.000 ± 0.000 | 10 |
|  | Malacostraca | 0.01023 ± 0.009691 | 43 |
| **GnRH** | Branchiopoda | 0.000 ± 0.000 | 2 |
|  | Thecostraca | 0.000 ± 0.000 | 3 |
|  | Hexanauplia | 0.000 ± 0.000 | 10 |
|  | Malacostraca | 0.0009037 ± 0.004396 | 43 |
| **GPA2** | Branchiopoda | 0.000 ± 0.000 | 2 |
|  | Thecostraca | 0.003584 ± 0.006208 | 3 |
|  | Hexanauplia | 0.000 ± 0.000 | 10 |
|  | Malacostraca | 0.004249 ± 0.01907 | 43 |
| **Table S5 Cont’d** |  |  |  |
| **GPB5** | Branchiopoda | 0.000 ± 0.000 | 2 |
|  | Thecostraca | 0.01075 ± 0.01862 | 3 |
|  | Hexanauplia | 0.003030 ± 0.009583 | 10 |
|  | Malacostraca | 0.000 ± 0.000 | 43 |
| **Hyrg** | Branchiopoda | 0.000 ± 0.000 | 2 |
|  | Thecostraca | 0.000 ± 0.000 | 3 |
|  | Hexanauplia | 0.000 ± 0.000 | 10 |
|  | Malacostraca | 0.01315 ± 0.01072 | 43 |
| **ILP** | Branchiopoda | 0.000 ± 0.000 | 2 |
|  | Thecostraca | 0.03025 ± 0.04342 | 3 |
|  | Hexanauplia | 0.000 ± 0.000 | 10 |
|  | Malacostraca | 0.0006260 ± 0.002891 | 43 |
| **ITP** | Branchiopoda | 0.1192 ± 0.1023 | 2 |
|  | Thecostraca | 0.06486 ± 0.03157 | 3 |
|  | Hexanauplia | 0.1000 ± 0.03449 | 10 |
|  | Malacostraca | 0.05642 ± 0.03064 | 43 |
| **K** | Branchiopoda | 0.000 ± 0.000 | 2 |
|  | Thecostraca | 0.000 ± 0.000 | 3 |
|  | Hexanauplia | 0.03099 ± 0.01848 | 10 |
|  | Malacostraca | 0.02627 ± 0.02731 | 43 |
| **Lst** | Branchiopoda | 0.007813 ± 0.01105 | 2 |
|  | Thecostraca | 0.000 ± 0.000 | 3 |
|  | Hexanauplia | 0.000 ± 0.000 | 10 |
|  | Malacostraca | 0.000 ± 0.000 | 43 |
| **Molt-inhibiting hormone** | Branchiopoda | 0.000 ± 0.000 | 2 |
|  | Thecostraca | 0.000 ± 0.000 | 3 |
|  | Hexanauplia | 0.008621 ± 0.02501 | 10 |
|  | Malacostraca | 0.01315 ± 0.01289 | 43 |
| **Table S5 Cont’d** |  |  |  |
| **MS** | Branchiopoda | 0.000 ± 0.000 | 2 |
|  | Thecostraca | 0.000 ± 0.000 | 3 |
|  | Hexanauplia | 0.003226 ± 0.01020 | 10 |
|  | Malacostraca | 0.0002556 ± 0.001676 | 43 |
| **NP** | Branchiopoda | 0.02626 ± 0.007052 | 2 |
|  | Thecostraca | 0.04436 ± 0.01837 | 3 |
|  | Hexanauplia | 0.05196 ± 0.06092 | 10 |
|  | Malacostraca | 0.1210 ± 0.06160 | 43 |
| **NPF** | Branchiopoda | 0.03690 ± 0.007992 | 2 |
|  | Thecostraca | 0.01669 ± 0.01488 | 3 |
|  | Hexanauplia | 0.04989 ± 0.05565 | 10 |
|  | Malacostraca | 0.04400 ± 0.02278 | 43 |
| **NPLP** | Branchiopoda | 0.000 ± 0.000 | 2 |
|  | Thecostraca | 0.000 ± 0.000 | 3 |
|  | Hexanauplia | 0.000 ± 0.000 | 10 |
|  | Malacostraca | 0.0005324 ± 0.002441 | 43 |
| **NTL** | Branchiopoda | 0.01845 ± 0.003997 | 2 |
|  | Thecostraca | 0.000 ± 0.000 | 3 |
|  | Hexanauplia | 0.000 ± 0.000 | 10 |
|  | Malacostraca | 0.01629 ± 0.02606 | 43 |
| **OK** | Branchiopoda | 0.01845 ± 0.003997 | 2 |
|  | Thecostraca | 0.06935 ± 0.03952 | 3 |
|  | Hexanauplia | 0.03092 ± 0.02508 | 10 |
|  | Malacostraca | 0.02841 ± 0.01888 | 43 |
| **PBAN** | Branchiopoda | 0.000 ± 0.000 | 2 |
|  | Thecostraca | 0.000 ± 0.000 | 3 |
|  | Hexanauplia | 0.000 ± 0.000 | 10 |
|  | Malacostraca | 0.002152 ± 0.01002 | 43 |
| **Table S5 Cont’d** |  |  |  |
| **PBAN-DH** | Branchiopoda | 0.000 ± 0.000 | 2 |
|  | Thecostraca | 0.000 ± 0.000 | 3 |
|  | Hexanauplia | 0.000 ± 0.000 | 10 |
|  | Malacostraca | 0.0005870 ± 0.002768 | 43 |
| **Pburs** | Branchiopoda | 0.000 ± 0.000 | 2 |
|  | Thecostraca | 0.000 ± 0.000 | 3 |
|  | Hexanauplia | 0.000 ± 0.000 | 10 |
|  | Malacostraca | 0.0009780 ± 0.003373 | 43 |
| **PDF** | Branchiopoda | 0.03408 ± 0.01810 | 2 |
|  | Thecostraca | 0.05479 ± 0.07702 | 3 |
|  | Hexanauplia | 0.007742 ± 0.01486 | 10 |
|  | Malacostraca | 0.04489 ± 0.03432 | 43 |
| **Periviscerokinin** | Branchiopoda | 0.05535 ± 0.01199 | 2 |
|  | Thecostraca | 0.02867 ± 0.04966 | 3 |
|  | Hexanauplia | 0.02798 ± 0.02334 | 10 |
|  | Malacostraca | 0.01131 ± 0.01662 | 43 |
| **PK** | Branchiopoda | 0.000 ± 0.000 | 2 |
|  | Thecostraca | 0.000 ± 0.000 | 3 |
|  | Hexanauplia | 0.000 ± 0.000 | 10 |
|  | Malacostraca | 0.006143 ± 0.01003 | 43 |
| **Proc** | Branchiopoda | 0.000 ± 0.000 | 2 |
|  | Thecostraca | 0.000 ± 0.000 | 3 |
|  | Hexanauplia | 0.000 ± 0.000 | 10 |
|  | Malacostraca | 0.0007156 ± 0.004692 | 43 |
| **PTTH** | Branchiopoda | 0.000 ± 0.000 | 2 |
|  | Thecostraca | 0.009524 ± 0.01650 | 3 |
|  | Hexanauplia | 0.000 ± 0.000 | 10 |
|  | Malacostraca | 0.0002736 ± 0.001794 | 43 |
| **Table S5 Cont’d** |  |  |  |
| **Relaxin** | Branchiopoda | 0.000 ± 0.000 | 2 |
|  | Thecostraca | 0.000 ± 0.000 | 3 |
|  | Hexanauplia | 0.000 ± 0.000 | 10 |
|  | Malacostraca | 0.004641 ± 0.007447 | 43 |
| **RPCH** | Branchiopoda | 0.03192 ± 0.04513 | 2 |
|  | Thecostraca | 0.000 ± 0.000 | 3 |
|  | Hexanauplia | 0.002174 ± 0.006874 | 10 |
|  | Malacostraca | 0.01509 ± 0.01047 | 43 |
| **RYa** | Branchiopoda | 0.000 ± 0.000 | 2 |
|  | Thecostraca | 0.000 ± 0.000 | 3 |
|  | Hexanauplia | 0.006522 ± 0.02062 | 10 |
|  | Malacostraca | 0.002691 ± 0.01324 | 43 |
| **SIFa** | Branchiopoda | 0.02626 ± 0.007052 | 2 |
|  | Thecostraca | 0.000 ± 0.000 | 3 |
|  | Hexanauplia | 0.000 ± 0.000 | 10 |
|  | Malacostraca | 0.01386 ± 0.009824 | 43 |
| **SK** | Branchiopoda | 0.03690 ± 0.007992 | 2 |
|  | Thecostraca | 0.000 ± 0.000 | 3 |
|  | Hexanauplia | 0.004348 ± 0.01375 | 10 |
|  | Malacostraca | 0.008744 ± 0.008113 | 43 |
| **sNPF** | Branchiopoda | 0.000 ± 0.000 | 2 |
|  | Thecostraca | 0.000 ± 0.000 | 3 |
|  | Hexanauplia | 0.000 ± 0.000 | 10 |
|  | Malacostraca | 0.01699 ± 0.01140 | 43 |
| **tPK** | Branchiopoda | 0.000 ± 0.000 | 2 |
|  | Thecostraca | 0.009524 ± 0.01650 | 3 |
|  | Hexanauplia | 0.000 ± 0.000 | 10 |
|  | Malacostraca | 0.002987 ± 0.008010 | 43 |
| **Table S5 Cont’d** |  |  |  |
| **Tris** | Branchiopoda | 0.000 ± 0.000 | 2 |
|  | Thecostraca | 0.01333 ± 0.02309 | 3 |
|  | Hexanauplia | 0.000 ± 0.000 | 10 |
|  | Malacostraca | 0.01329 ± 0.01006 | 43 |
| **TRP** | Branchiopoda | 0.000 ± 0.000 | 2 |
|  | Thecostraca | 0.009524 ± 0.01650 | 3 |
|  | Hexanauplia | 0.004122 ± 0.009720 | 10 |
|  | Malacostraca | 0.02219 ± 0.01623 | 43 |
| **Vasopressin-neurophysin** | Branchiopoda | 0.007813 ± 0.01105 | 2 |
|  | Thecostraca | 0.000 ± 0.000 | 3 |
|  | Hexanauplia | 0.000 ± 0.000 | 10 |
|  | Malacostraca | 0.002623 ± 0.007610 | 43 |
| **VPL** | Branchiopoda | 0.000 ± 0.000 | 2 |
|  | Thecostraca | 0.000 ± 0.000 | 3 |
|  | Hexanauplia | 0.02018 ± 0.01664 | 10 |
|  | Malacostraca | 0.01706 ± 0.02232 | 43 |

See Table S2 for the full names of all neuropeptide families.

**Table S6** Statistical comparisons of relative abundances of neuropeptide family member numbers for each family across Class Branchiopoda, Thecostraca, Hexanauplia, and Malacostraca

| **Neuropeptide family** | **Pairwise comparison** | **Mean rank diff.** | **P-value** | **Summary** |
| --- | --- | --- | --- | --- |
| **ACP** | Branchiopoda vs. Thecostraca | 0.000 | >0.9999 | ns |
|  | Branchiopoda vs. Hexanauplia | -6.850 | 0.5851 | ns |
|  | Branchiopoda vs. Malacostraca | -20.66 | 0.0778 | ns |
|  | Thecostraca vs. Hexanauplia | -6.850 | 0.5206 | ns |
|  | Thecostraca vs. Malacostraca | -20.66 | 0.0327 | * |
|  | Hexanauplia vs. Malacostraca | -13.81 | 0.0151 | * |
| **ADF** | Branchiopoda vs. Thecostraca | 0.000 | >0.9999 | ns |
|  | Branchiopoda vs. Hexanauplia | 0.000 | >0.9999 | ns |
|  | Branchiopoda vs. Malacostraca | -0.6744 | 0.8066 | ns |
|  | Thecostraca vs. Hexanauplia | 0.000 | >0.9999 | ns |
|  | Thecostraca vs. Malacostraca | -0.6744 | 0.7668 | ns |
|  | Hexanauplia vs. Malacostraca | -0.6744 | 0.6139 | ns |
| **Agatoxin-like peptide** | Branchiopoda vs. Thecostraca | -23.25 | 0.1310 | ns |
|  | Branchiopoda vs. Hexanauplia | -19.80 | 0.1296 | ns |
|  | Branchiopoda vs. Malacostraca | 3.866 | 0.7513 | ns |
|  | Thecostraca vs. Hexanauplia | 3.450 | 0.7560 | ns |
|  | Thecostraca vs. Malacostraca | 27.12 | 0.0071 | ** |
|  | Hexanauplia vs. Malacostraca | 23.67 | <0.0001 | **** |
| **AKH** | Branchiopoda vs. Thecostraca | 0.000 | >0.9999 | ns |
|  | Branchiopoda vs. Hexanauplia | -3.000 | 0.6852 | ns |
|  | Branchiopoda vs. Malacostraca | -4.023 | 0.5605 | ns |
|  | Thecostraca vs. Hexanauplia | -3.000 | 0.6334 | ns |
|  | Thecostraca vs. Malacostraca | -4.023 | 0.4808 | ns |
|  | Hexanauplia vs. Malacostraca | -1.023 | 0.7604 | ns |
| **Table S6 Cont’d** |  |  |  |  |
| **AstA** | Branchiopoda vs. Thecostraca | -25.50 | 0.0980 | ns |
|  | Branchiopoda vs. Hexanauplia | -14.55 | 0.2658 | ns |
|  | Branchiopoda vs. Malacostraca | 1.116 | 0.9272 | ns |
|  | Thecostraca vs. Hexanauplia | 10.95 | 0.3244 | ns |
|  | Thecostraca vs. Malacostraca | 26.62 | 0.0083 | ** |
|  | Hexanauplia vs. Malacostraca | 15.67 | 0.0082 | ** |
| **AstB** | Branchiopoda vs. Thecostraca | 0.000 | >0.9999 | ns |
|  | Branchiopoda vs. Hexanauplia | 0.000 | >0.9999 | ns |
|  | Branchiopoda vs. Malacostraca | -24.95 | 0.0363 | * |
|  | Thecostraca vs. Hexanauplia | 0.000 | >0.9999 | ns |
|  | Thecostraca vs. Malacostraca | -24.95 | 0.0112 | * |
|  | Hexanauplia vs. Malacostraca | -24.95 | <0.0001 | **** |
| **AstC** | Branchiopoda vs. Thecostraca | -11.25 | 0.4623 | ns |
|  | Branchiopoda vs. Hexanauplia | -6.800 | 0.6006 | ns |
|  | Branchiopoda vs. Malacostraca | -5.390 | 0.6568 | ns |
|  | Thecostraca vs. Hexanauplia | 4.450 | 0.6868 | ns |
|  | Thecostraca vs. Malacostraca | 5.860 | 0.5583 | ns |
|  | Hexanauplia vs. Malacostraca | 1.410 | 0.8106 | ns |
| **AstCC** | Branchiopoda vs. Thecostraca | 11.08 | 0.4702 | ns |
|  | Branchiopoda vs. Hexanauplia | -7.000 | 0.5909 | ns |
|  | Branchiopoda vs. Malacostraca | 4.564 | 0.7074 | ns |
|  | Thecostraca vs. Hexanauplia | -18.08 | 0.1022 | ns |
|  | Thecostraca vs. Malacostraca | -6.519 | 0.5161 | ns |
|  | Hexanauplia vs. Malacostraca | 11.56 | 0.0501 | ns |
|  |  |  |  |  |
|  |  |  |  |  |
| **Table S6 Cont’d** |  |  |  |  |
| **AstCCC** | Branchiopoda vs. Thecostraca | -19.67 | 0.1981 | ns |
|  | Branchiopoda vs. Hexanauplia | 25.00 | 0.0538 | ns |
|  | Branchiopoda vs. Malacostraca | 0.2791 | 0.9816 | ns |
|  | Thecostraca vs. Hexanauplia | 44.67 | <0.0001 | **** |
|  | Thecostraca vs. Malacostraca | 19.95 | 0.0460 | * |
|  | Hexanauplia vs. Malacostraca | -24.72 | <0.0001 | **** |
| **AT** | Branchiopoda vs. Thecostraca | 0.000 | >0.9999 | ns |
|  | Branchiopoda vs. Hexanauplia | 0.000 | >0.9999 | ns |
|  | Branchiopoda vs. Malacostraca | -4.721 | 0.4946 | ns |
|  | Thecostraca vs. Hexanauplia | 0.000 | >0.9999 | ns |
|  | Thecostraca vs. Malacostraca | -4.721 | 0.4080 | ns |
|  | Hexanauplia vs. Malacostraca | -4.721 | 0.1594 | ns |
| **Burs** | Branchiopoda vs. Thecostraca | 1.917 | 0.9010 | ns |
|  | Branchiopoda vs. Hexanauplia | 7.550 | 0.5637 | ns |
|  | Branchiopoda vs. Malacostraca | 22.05 | 0.0710 | ns |
|  | Thecostraca vs. Hexanauplia | 5.633 | 0.6123 | ns |
|  | Thecostraca vs. Malacostraca | 20.14 | 0.0458 | * |
|  | Hexanauplia vs. Malacostraca | 14.50 | 0.0144 | * |
| **Cal** | Branchiopoda vs. Thecostraca | -25.08 | 0.1025 | ns |
|  | Branchiopoda vs. Hexanauplia | 7.400 | 0.5702 | ns |
|  | Branchiopoda vs. Malacostraca | -6.378 | 0.6003 | ns |
|  | Thecostraca vs. Hexanauplia | 32.48 | 0.0034 | ** |
|  | Thecostraca vs. Malacostraca | 18.71 | 0.0627 | ns |
|  | Hexanauplia vs. Malacostraca | -13.78 | 0.0197 | * |
|  |  |  |  |  |
|  |  |  |  |  |
| **Table S6 Cont’d** |  |  |  |  |
| **CAPA** | Branchiopoda vs. Thecostraca | 0.000 | >0.9999 | ns |
|  | Branchiopoda vs. Hexanauplia | -2.900 | 0.5635 | ns |
|  | Branchiopoda vs. Malacostraca | -1.349 | 0.7736 | ns |
|  | Thecostraca vs. Hexanauplia | -2.900 | 0.4967 | ns |
|  | Thecostraca vs. Malacostraca | -1.349 | 0.7275 | ns |
|  | Hexanauplia vs. Malacostraca | 1.551 | 0.4954 | ns |
| **CCHa** | Branchiopoda vs. Thecostraca | 0.000 | >0.9999 | ns |
|  | Branchiopoda vs. Hexanauplia | 0.000 | >0.9999 | ns |
|  | Branchiopoda vs. Malacostraca | -24.28 | 0.0409 | * |
|  | Thecostraca vs. Hexanauplia | 0.000 | >0.9999 | ns |
|  | Thecostraca vs. Malacostraca | -24.28 | 0.0133 | * |
|  | Hexanauplia vs. Malacostraca | -24.28 | <0.0001 | **** |
| **CCRFamide** | Branchiopoda vs. Thecostraca | -6.000 | 0.6864 | ns |
|  | Branchiopoda vs. Hexanauplia | -33.00 | 0.0089 | ** |
|  | Branchiopoda vs. Malacostraca | -14.84 | 0.2076 | ns |
|  | Thecostraca vs. Hexanauplia | -27.00 | 0.0117 | * |
|  | Thecostraca vs. Malacostraca | -8.837 | 0.3633 | ns |
|  | Hexanauplia vs. Malacostraca | 18.16 | 0.0015 | ** |
| **CHH** | Branchiopoda vs. Thecostraca | -4.667 | 0.7546 | ns |
|  | Branchiopoda vs. Hexanauplia | 0.000 | >0.9999 | ns |
|  | Branchiopoda vs. Malacostraca | -23.28 | 0.0491 | * |
|  | Thecostraca vs. Hexanauplia | 4.667 | 0.6646 | ns |
|  | Thecostraca vs. Malacostraca | -18.61 | 0.0566 | ns |
|  | Hexanauplia vs. Malacostraca | -23.28 | <0.0001 | **** |
|  |  |  |  |  |
|  |  |  |  |  |
| **Table S6 Cont’d** |  |  |  |  |
| **CHH-MIH-like** | Branchiopoda vs. Thecostraca | 0.000 | >0.9999 | ns |
|  | Branchiopoda vs. Hexanauplia | -4.100 | 0.7438 | ns |
|  | Branchiopoda vs. Malacostraca | -21.30 | 0.0690 | ns |
|  | Thecostraca vs. Hexanauplia | -4.100 | 0.7006 | ns |
|  | Thecostraca vs. Malacostraca | -21.30 | 0.0276 | * |
|  | Hexanauplia vs. Malacostraca | -17.20 | 0.0025 | ** |
| **CNMamide** | Branchiopoda vs. Thecostraca | 21.75 | 0.1342 | ns |
|  | Branchiopoda vs. Hexanauplia | 21.75 | 0.0776 | ns |
|  | Branchiopoda vs. Malacostraca | 2.529 | 0.8261 | ns |
|  | Thecostraca vs. Hexanauplia | 0.000 | >0.9999 | ns |
|  | Thecostraca vs. Malacostraca | -19.22 | 0.0430 | * |
|  | Hexanauplia vs. Malacostraca | -19.22 | 0.0006 | *** |
| **CRF-like diuretic hormone** | Branchiopoda vs. Thecostraca | 0.000 | >0.9999 | ns |
|  | Branchiopoda vs. Hexanauplia | 0.000 | >0.9999 | ns |
|  | Branchiopoda vs. Malacostraca | -24.95 | 0.0363 | * |
|  | Thecostraca vs. Hexanauplia | 0.000 | >0.9999 | ns |
|  | Thecostraca vs. Malacostraca | -24.95 | 0.0112 | * |
|  | Hexanauplia vs. Malacostraca | -24.95 | <0.0001 | **** |
| **Crustacean female sex hormone** | Branchiopoda vs. Thecostraca | 24.00 | 0.1130 | ns |
|  | Branchiopoda vs. Hexanauplia | 19.20 | 0.1351 | ns |
|  | Branchiopoda vs. Malacostraca | -0.06977 | 0.9954 | ns |
|  | Thecostraca vs. Hexanauplia | -4.800 | 0.6602 | ns |
|  | Thecostraca vs. Malacostraca | -24.07 | 0.0151 | * |
|  | Hexanauplia vs. Malacostraca | -19.27 | 0.0009 | *** |
|  |  |  |  |  |
|  |  |  |  |  |
| **Table S6 Cont’d** |  |  |  |  |
| **Crz** | Branchiopoda vs. Thecostraca | 17.50 | 0.2447 | ns |
|  | Branchiopoda vs. Hexanauplia | 7.200 | 0.5727 | ns |
|  | Branchiopoda vs. Malacostraca | -4.244 | 0.7218 | ns |
|  | Thecostraca vs. Hexanauplia | -10.30 | 0.3424 | ns |
|  | Thecostraca vs. Malacostraca | -21.74 | 0.0271 | * |
|  | Hexanauplia vs. Malacostraca | -11.44 | 0.0479 | * |
| **DH31** | Branchiopoda vs. Thecostraca | -11.67 | 0.4489 | ns |
|  | Branchiopoda vs. Hexanauplia | -9.400 | 0.4721 | ns |
|  | Branchiopoda vs. Malacostraca | 16.49 | 0.1768 | ns |
|  | Thecostraca vs. Hexanauplia | 2.267 | 0.8383 | ns |
|  | Thecostraca vs. Malacostraca | 28.16 | 0.0052 | ** |
|  | Hexanauplia vs. Malacostraca | 25.89 | <0.0001 | **** |
| **DH44** | Branchiopoda vs. Thecostraca | -4.833 | 0.6967 | ns |
|  | Branchiopoda vs. Hexanauplia | 0.2500 | 0.9810 | ns |
|  | Branchiopoda vs. Malacostraca | 23.88 | 0.0151 | * |
|  | Thecostraca vs. Hexanauplia | 5.083 | 0.5696 | ns |
|  | Thecostraca vs. Malacostraca | 28.72 | 0.0004 | *** |
|  | Hexanauplia vs. Malacostraca | 23.63 | <0.0001 | **** |
| **EFLamide** | Branchiopoda vs. Thecostraca | 12.33 | 0.4230 | ns |
|  | Branchiopoda vs. Hexanauplia | -1.700 | 0.8965 | ns |
|  | Branchiopoda vs. Malacostraca | 15.72 | 0.1975 | ns |
|  | Thecostraca vs. Hexanauplia | -14.03 | 0.2062 | ns |
|  | Thecostraca vs. Malacostraca | 3.388 | 0.7366 | ns |
|  | Hexanauplia vs. Malacostraca | 17.42 | 0.0033 | ** |
|  |  |  |  |  |
|  |  |  |  |  |
| **Table S6 Cont’d** |  |  |  |  |
| **EH** | Branchiopoda vs. Thecostraca | -0.1667 | 0.9914 | ns |
|  | Branchiopoda vs. Hexanauplia | 32.70 | 0.0123 | * |
|  | Branchiopoda vs. Malacostraca | 26.13 | 0.0322 | * |
|  | Thecostraca vs. Hexanauplia | 32.87 | 0.0031 | ** |
|  | Thecostraca vs. Malacostraca | 26.29 | 0.0090 | ** |
|  | Hexanauplia vs. Malacostraca | -6.572 | 0.2670 | ns |
| **Ele** | Branchiopoda vs. Thecostraca | 31.25 | 0.0415 | * |
|  | Branchiopoda vs. Hexanauplia | 0.2500 | 0.9847 | ns |
|  | Branchiopoda vs. Malacostraca | 9.564 | 0.4310 | ns |
|  | Thecostraca vs. Hexanauplia | -31.00 | 0.0050 | ** |
|  | Thecostraca vs. Malacostraca | -21.69 | 0.0306 | * |
|  | Hexanauplia vs. Malacostraca | 9.314 | 0.1141 | ns |
| **Elongated pigment-dispersing hormone** | Branchiopoda vs. Thecostraca | -11.17 | 0.4352 | ns |
|  | Branchiopoda vs. Hexanauplia | 0.000 | >0.9999 | ns |
|  | Branchiopoda vs. Malacostraca | -18.10 | 0.1104 | ns |
|  | Thecostraca vs. Hexanauplia | 11.17 | 0.2792 | ns |
|  | Thecostraca vs. Malacostraca | -6.938 | 0.4586 | ns |
|  | Hexanauplia vs. Malacostraca | -18.10 | 0.0010 | ** |
| **ETH** | Branchiopoda vs. Thecostraca | 0.000 | >0.9999 | ns |
|  | Branchiopoda vs. Hexanauplia | 0.000 | >0.9999 | ns |
|  | Branchiopoda vs. Malacostraca | -10.79 | 0.2620 | ns |
|  | Thecostraca vs. Hexanauplia | 0.000 | >0.9999 | ns |
|  | Thecostraca vs. Malacostraca | -10.79 | 0.1743 | ns |
|  | Hexanauplia vs. Malacostraca | -10.79 | 0.0208 | * |
|  |  |  |  |  |
|  |  |  |  |  |
| **Table S6 Cont’d** |  |  |  |  |
| **FMRFa** | Branchiopoda vs. Thecostraca | 0.0000 | >0.9999 | ns |
|  | Branchiopoda vs. Hexanauplia | -3.050 | 0.7232 | ns |
|  | Branchiopoda vs. Malacostraca | -6.035 | 0.4529 | ns |
|  | Thecostraca vs. Hexanauplia | -3.050 | 0.6768 | ns |
|  | Thecostraca vs. Malacostraca | -6.035 | 0.3632 | ns |
|  | Hexanauplia vs. Malacostraca | -2.985 | 0.4443 | ns |
| **Glycoprotein-A** | Branchiopoda vs. Thecostraca | 8.083 | 0.5897 | ns |
|  | Branchiopoda vs. Hexanauplia | 36.25 | 0.0044 | ** |
|  | Branchiopoda vs. Malacostraca | 15.62 | 0.1884 | ns |
|  | Thecostraca vs. Hexanauplia | 28.17 | 0.0092 | ** |
|  | Thecostraca vs. Malacostraca | 7.539 | 0.4420 | ns |
|  | Hexanauplia vs. Malacostraca | -20.63 | 0.0003 | *** |
| **Glycoprotein-B** | Branchiopoda vs. Thecostraca | 26.67 | 0.0663 | ns |
|  | Branchiopoda vs. Hexanauplia | 39.50 | 0.0013 | ** |
|  | Branchiopoda vs. Malacostraca | 22.00 | 0.0559 | ns |
|  | Thecostraca vs. Hexanauplia | 12.83 | 0.2204 | ns |
|  | Thecostraca vs. Malacostraca | -4.667 | 0.6233 | ns |
|  | Hexanauplia vs. Malacostraca | -17.50 | 0.0017 | ** |
| **GnRH** | Branchiopoda vs. Thecostraca | 0.000 | >0.9999 | ns |
|  | Branchiopoda vs. Hexanauplia | 0.000 | >0.9999 | ns |
|  | Branchiopoda vs. Malacostraca | -1.349 | 0.7269 | ns |
|  | Thecostraca vs. Hexanauplia | 0.000 | >0.9999 | ns |
|  | Thecostraca vs. Malacostraca | -1.349 | 0.6722 | ns |
|  | Hexanauplia vs. Malacostraca | -1.349 | 0.4717 | ns |
|  |  |  |  |  |
|  |  |  |  |  |
| **Table S6 Cont’d** |  |  |  |  |
| **GPA2** | Branchiopoda vs. Thecostraca | -9.000 | 0.2304 | ns |
|  | Branchiopoda vs. Hexanauplia | 0.000 | >0.9999 | ns |
|  | Branchiopoda vs. Malacostraca | -2.744 | 0.6445 | ns |
|  | Thecostraca vs. Hexanauplia | 9.000 | 0.0963 | ns |
|  | Thecostraca vs. Malacostraca | 6.256 | 0.2026 | ns |
|  | Hexanauplia vs. Malacostraca | -2.744 | 0.3417 | ns |
| **GPB5** | Branchiopoda vs. Thecostraca | -9.833 | 0.0436 | * |
|  | Branchiopoda vs. Hexanauplia | -2.850 | 0.4907 | ns |
|  | Branchiopoda vs. Malacostraca | 0.000 | >0.9999 | ns |
|  | Thecostraca vs. Hexanauplia | 6.983 | 0.0469 | * |
|  | Thecostraca vs. Malacostraca | 9.833 | 0.0020 | ** |
|  | Hexanauplia vs. Malacostraca | 2.850 | 0.1284 | ns |
| **Hyrg** | Branchiopoda vs. Thecostraca | 0.000 | >0.9999 | ns |
|  | Branchiopoda vs. Hexanauplia | 0.000 | >0.9999 | ns |
|  | Branchiopoda vs. Malacostraca | -20.91 | 0.0711 | ns |
|  | Thecostraca vs. Hexanauplia | 0.000 | >0.9999 | ns |
|  | Thecostraca vs. Malacostraca | -20.91 | 0.0288 | * |
|  | Hexanauplia vs. Malacostraca | -20.91 | 0.0002 | *** |
| **ILP** | Branchiopoda vs. Thecostraca | -19.33 | 0.0043 | ** |
|  | Branchiopoda vs. Hexanauplia | 0.000 | >0.9999 | ns |
|  | Branchiopoda vs. Malacostraca | -1.349 | 0.8015 | ns |
|  | Thecostraca vs. Hexanauplia | 19.33 | <0.0001 | **** |
|  | Thecostraca vs. Malacostraca | 17.98 | <0.0001 | **** |
|  | Hexanauplia vs. Malacostraca | -1.349 | 0.6045 | ns |
|  |  |  |  |  |
|  |  |  |  |  |
| **Table S6 Cont’d** |  |  |  |  |
| **ITP** | Branchiopoda vs. Thecostraca | 10.58 | 0.4923 | ns |
|  | Branchiopoda vs. Hexanauplia | -3.850 | 0.7685 | ns |
|  | Branchiopoda vs. Malacostraca | 15.33 | 0.2094 | ns |
|  | Thecostraca vs. Hexanauplia | -14.43 | 0.1941 | ns |
|  | Thecostraca vs. Malacostraca | 4.748 | 0.6377 | ns |
|  | Hexanauplia vs. Malacostraca | 19.18 | 0.0012 | ** |
| **K** | Branchiopoda vs. Thecostraca | 0.000 | >0.9999 | ns |
|  | Branchiopoda vs. Hexanauplia | -26.55 | 0.0388 | * |
|  | Branchiopoda vs. Malacostraca | -20.13 | 0.0935 | ns |
|  | Thecostraca vs. Hexanauplia | -26.55 | 0.0150 | * |
|  | Thecostraca vs. Malacostraca | -20.13 | 0.0422 | * |
|  | Hexanauplia vs. Malacostraca | 6.422 | 0.2701 | ns |
| **Lst** | Branchiopoda vs. Thecostraca | 14.50 | <0.0001 | **** |
|  | Branchiopoda vs. Hexanauplia | 14.50 | <0.0001 | **** |
|  | Branchiopoda vs. Malacostraca | 14.50 | <0.0001 | **** |
|  | Thecostraca vs. Hexanauplia | 0.000 | >0.9999 | ns |
|  | Thecostraca vs. Malacostraca | 0.000 | >0.9999 | ns |
|  | Hexanauplia vs. Malacostraca | 0.000 | >0.9999 | ns |
| **Molt-inhibiting hormone** | Branchiopoda vs. Thecostraca | 0.000 | >0.9999 | ns |
|  | Branchiopoda vs. Hexanauplia | -5.800 | 0.6400 | ns |
|  | Branchiopoda vs. Malacostraca | -19.56 | 0.0913 | ns |
|  | Thecostraca vs. Hexanauplia | -5.800 | 0.5821 | ns |
|  | Thecostraca vs. Malacostraca | -19.56 | 0.0408 | * |
|  | Hexanauplia vs. Malacostraca | -13.76 | 0.0144 | * |
|  |  |  |  |  |
|  |  |  |  |  |
| **Table S6 Cont’d** |  |  |  |  |
| **MS** | Branchiopoda vs. Thecostraca | 0.000 | >0.9999 | ns |
|  | Branchiopoda vs. Hexanauplia | -2.950 | 0.4756 | ns |
|  | Branchiopoda vs. Malacostraca | -0.6628 | 0.8637 | ns |
|  | Thecostraca vs. Hexanauplia | -2.950 | 0.4012 | ns |
|  | Thecostraca vs. Malacostraca | -0.6628 | 0.8353 | ns |
|  | Hexanauplia vs. Malacostraca | 2.287 | 0.2223 | ns |
| **NP** | Branchiopoda vs. Thecostraca | -4.667 | 0.7621 | ns |
|  | Branchiopoda vs. Hexanauplia | -7.050 | 0.5899 | ns |
|  | Branchiopoda vs. Malacostraca | -27.03 | 0.0269 | * |
|  | Thecostraca vs. Hexanauplia | -2.383 | 0.8302 | ns |
|  | Thecostraca vs. Malacostraca | -22.37 | 0.0265 | * |
|  | Hexanauplia vs. Malacostraca | -19.98 | 0.0007 | *** |
| **NPF** | Branchiopoda vs. Thecostraca | 15.58 | 0.3118 | ns |
|  | Branchiopoda vs. Hexanauplia | -2.350 | 0.8573 | ns |
|  | Branchiopoda vs. Malacostraca | -4.250 | 0.7277 | ns |
|  | Thecostraca vs. Hexanauplia | -17.93 | 0.1065 | ns |
|  | Thecostraca vs. Malacostraca | -19.83 | 0.0491 | * |
|  | Hexanauplia vs. Malacostraca | -1.900 | 0.7485 | ns |
| **NPLP** | Branchiopoda vs. Thecostraca | 0.000 | >0.9999 | ns |
|  | Branchiopoda vs. Hexanauplia | 0.000 | >0.9999 | ns |
|  | Branchiopoda vs. Malacostraca | -1.349 | 0.7269 | ns |
|  | Thecostraca vs. Hexanauplia | 0.000 | >0.9999 | ns |
|  | Thecostraca vs. Malacostraca | -1.349 | 0.6722 | ns |
|  | Hexanauplia vs. Malacostraca | -1.349 | 0.4717 | ns |
|  |  |  |  |  |
|  |  |  |  |  |
| **Table S6 Cont’d** |  |  |  |  |
| **NTL** | Branchiopoda vs. Thecostraca | 26.50 | 0.0488 | * |
|  | Branchiopoda vs. Hexanauplia | 26.50 | 0.0202 | * |
|  | Branchiopoda vs. Malacostraca | 12.90 | 0.2262 | ns |
|  | Thecostraca vs. Hexanauplia | 0.000 | >0.9999 | ns |
|  | Thecostraca vs. Malacostraca | -13.60 | 0.1220 | ns |
|  | Hexanauplia vs. Malacostraca | -13.60 | 0.0085 | ** |
| **OK** | Branchiopoda vs. Thecostraca | -31.92 | 0.0383 | * |
|  | Branchiopoda vs. Hexanauplia | -10.00 | 0.4444 | ns |
|  | Branchiopoda vs. Malacostraca | -9.273 | 0.4476 | ns |
|  | Thecostraca vs. Hexanauplia | 21.92 | 0.0486 | * |
|  | Thecostraca vs. Malacostraca | 22.64 | 0.0247 | * |
|  | Hexanauplia vs. Malacostraca | 0.7267 | 0.9024 | ns |
| **PBAN** | Branchiopoda vs. Thecostraca | 0.000 | >0.9999 | ns |
|  | Branchiopoda vs. Hexanauplia | 0.000 | >0.9999 | ns |
|  | Branchiopoda vs. Malacostraca | -2.023 | 0.6661 | ns |
|  | Thecostraca vs. Hexanauplia | 0.000 | >0.9999 | ns |
|  | Thecostraca vs. Malacostraca | -2.023 | 0.6011 | ns |
|  | Hexanauplia vs. Malacostraca | -2.023 | 0.3739 | ns |
| **PBAN-DH** | Branchiopoda vs. Thecostraca | 0.000 | >0.9999 | ns |
|  | Branchiopoda vs. Hexanauplia | 0.000 | >0.9999 | ns |
|  | Branchiopoda vs. Malacostraca | -1.349 | 0.7269 | ns |
|  | Thecostraca vs. Hexanauplia | 0.000 | >0.9999 | ns |
|  | Thecostraca vs. Malacostraca | -1.349 | 0.6722 | ns |
|  | Hexanauplia vs. Malacostraca | -1.349 | 0.4717 | ns |
|  |  |  |  |  |
|  |  |  |  |  |
| **Table S6 Cont’d** |  |  |  |  |
| **Pburs** | Branchiopoda vs. Thecostraca | 0.000 | >0.9999 | ns |
|  | Branchiopoda vs. Hexanauplia | 0.000 | >0.9999 | ns |
|  | Branchiopoda vs. Malacostraca | -2.698 | 0.6152 | ns |
|  | Thecostraca vs. Hexanauplia | 0.000 | >0.9999 | ns |
|  | Thecostraca vs. Malacostraca | -2.698 | 0.5426 | ns |
|  | Hexanauplia vs. Malacostraca | -2.698 | 0.3003 | ns |
| **PDF** | Branchiopoda vs. Thecostraca | 2.917 | 0.8494 | ns |
|  | Branchiopoda vs. Hexanauplia | 19.50 | 0.1347 | ns |
|  | Branchiopoda vs. Malacostraca | -2.378 | 0.8451 | ns |
|  | Thecostraca vs. Hexanauplia | 16.58 | 0.1344 | ns |
|  | Thecostraca vs. Malacostraca | -5.295 | 0.5983 | ns |
|  | Hexanauplia vs. Malacostraca | -21.88 | 0.0002 | *** |
| **Periviscerokinin** | Branchiopoda vs. Thecostraca | 26.50 | 0.0771 | ns |
|  | Branchiopoda vs. Hexanauplia | 15.55 | 0.2215 | ns |
|  | Branchiopoda vs. Malacostraca | 26.91 | 0.0235 | * |
|  | Thecostraca vs. Hexanauplia | -10.95 | 0.3110 | ns |
|  | Thecostraca vs. Malacostraca | 0.4070 | 0.9669 | ns |
|  | Hexanauplia vs. Malacostraca | 11.36 | 0.0488 | * |
| **PK** | Branchiopoda vs. Thecostraca | 0.000 | >0.9999 | ns |
|  | Branchiopoda vs. Hexanauplia | 0.000 | >0.9999 | ns |
|  | Branchiopoda vs. Malacostraca | -9.442 | 0.3031 | ns |
|  | Thecostraca vs. Hexanauplia | 0.000 | >0.9999 | ns |
|  | Thecostraca vs. Malacostraca | -9.442 | 0.2123 | ns |
|  | Hexanauplia vs. Malacostraca | -9.442 | 0.0339 | * |
|  |  |  |  |  |
|  |  |  |  |  |
| **Table S6 Cont’d** |  |  |  |  |
| **Proc** | Branchiopoda vs. Thecostraca | 0.000 | >0.9999 | ns |
|  | Branchiopoda vs. Hexanauplia | 0.000 | >0.9999 | ns |
|  | Branchiopoda vs. Malacostraca | -0.6744 | 0.8066 | ns |
|  | Thecostraca vs. Hexanauplia | 0.000 | >0.9999 | ns |
|  | Thecostraca vs. Malacostraca | -0.6744 | 0.7668 | ns |
|  | Hexanauplia vs. Malacostraca | -0.6744 | 0.6139 | ns |
| **PTTH** | Branchiopoda vs. Thecostraca | -9.833 | 0.0436 | * |
|  | Branchiopoda vs. Hexanauplia | 0.000 | >0.9999 | ns |
|  | Branchiopoda vs. Malacostraca | -0.6628 | 0.8637 | ns |
|  | Thecostraca vs. Hexanauplia | 9.833 | 0.0051 | ** |
|  | Thecostraca vs. Malacostraca | 9.171 | 0.0040 | ** |
|  | Hexanauplia vs. Malacostraca | -0.6628 | 0.7236 | ns |
| **Relaxin** | Branchiopoda vs. Thecostraca | 0.000 | >0.9999 | ns |
|  | Branchiopoda vs. Hexanauplia | 0.000 | >0.9999 | ns |
|  | Branchiopoda vs. Malacostraca | -9.442 | 0.3031 | ns |
|  | Thecostraca vs. Hexanauplia | 0.000 | >0.9999 | ns |
|  | Thecostraca vs. Malacostraca | -9.442 | 0.2122 | ns |
|  | Hexanauplia vs. Malacostraca | -9.442 | 0.0339 | * |
| **RPCH** | Branchiopoda vs. Thecostraca | 24.25 | 0.1102 | ns |
|  | Branchiopoda vs. Hexanauplia | 20.20 | 0.1169 | ns |
|  | Branchiopoda vs. Malacostraca | -0.6570 | 0.9565 | ns |
|  | Thecostraca vs. Hexanauplia | -4.050 | 0.7115 | ns |
|  | Thecostraca vs. Malacostraca | -24.91 | 0.0121 | * |
|  | Hexanauplia vs. Malacostraca | -20.86 | 0.0004 | *** |
|  |  |  |  |  |
|  |  |  |  |  |
| **Table S6 Cont’d** |  |  |  |  |
| **RYa** | Branchiopoda vs. Thecostraca | 0.000 | >0.9999 | ns |
|  | Branchiopoda vs. Hexanauplia | -2.900 | 0.5635 | ns |
|  | Branchiopoda vs. Malacostraca | -1.349 | 0.7736 | ns |
|  | Thecostraca vs. Hexanauplia | -2.900 | 0.4967 | ns |
|  | Thecostraca vs. Malacostraca | -1.349 | 0.7275 | ns |
|  | Hexanauplia vs. Malacostraca | 1.551 | 0.4954 | ns |
| **SIFa** | Branchiopoda vs. Thecostraca | 41.75 | 0.0057 | ** |
|  | Branchiopoda vs. Hexanauplia | 41.75 | 0.0011 | ** |
|  | Branchiopoda vs. Malacostraca | 18.06 | 0.1310 | ns |
|  | Thecostraca vs. Hexanauplia | 0.000 | >0.9999 | ns |
|  | Thecostraca vs. Malacostraca | -23.69 | 0.0165 | * |
|  | Hexanauplia vs. Malacostraca | -23.69 | <0.0001 | **** |
| **SK** | Branchiopoda vs. Thecostraca | 41.50 | 0.0043 | ** |
|  | Branchiopoda vs. Hexanauplia | 37.15 | 0.0026 | ** |
|  | Branchiopoda vs. Malacostraca | 24.21 | 0.0354 | * |
|  | Thecostraca vs. Hexanauplia | -4.350 | 0.6779 | ns |
|  | Thecostraca vs. Malacostraca | -17.29 | 0.0687 | ns |
|  | Hexanauplia vs. Malacostraca | -12.94 | 0.0205 | * |
| **sNPF** | Branchiopoda vs. Thecostraca | 0.000 | >0.9999 | ns |
|  | Branchiopoda vs. Hexanauplia | 0.000 | >0.9999 | ns |
|  | Branchiopoda vs. Malacostraca | -25.63 | 0.0322 | * |
|  | Thecostraca vs. Hexanauplia | 0.000 | >0.9999 | ns |
|  | Thecostraca vs. Malacostraca | -25.63 | 0.0095 | ** |
|  | Hexanauplia vs. Malacostraca | -25.63 | <0.0001 | **** |
|  |  |  |  |  |
|  |  |  |  |  |
| **Table S6 Cont’d** |  |  |  |  |
| **tPK** | Branchiopoda vs. Thecostraca | -10.50 | 0.2559 | ns |
|  | Branchiopoda vs. Hexanauplia | 0.000 | >0.9999 | ns |
|  | Branchiopoda vs. Malacostraca | -4.663 | 0.5243 | ns |
|  | Thecostraca vs. Hexanauplia | 10.50 | 0.1151 | ns |
|  | Thecostraca vs. Malacostraca | 5.837 | 0.3343 | ns |
|  | Hexanauplia vs. Malacostraca | -4.663 | 0.1896 | ns |
| **Tris** | Branchiopoda vs. Thecostraca | -15.00 | 0.3149 | ns |
|  | Branchiopoda vs. Hexanauplia | 0.000 | >0.9999 | ns |
|  | Branchiopoda vs. Malacostraca | -22.56 | 0.0565 | ns |
|  | Thecostraca vs. Hexanauplia | 15.00 | 0.1635 | ns |
|  | Thecostraca vs. Malacostraca | -7.558 | 0.4389 | ns |
|  | Hexanauplia vs. Malacostraca | -22.56 | <0.0001 | **** |
| **TRP** | Branchiopoda vs. Thecostraca | -13.67 | 0.3726 | ns |
|  | Branchiopoda vs. Hexanauplia | -5.750 | 0.6584 | ns |
|  | Branchiopoda vs. Malacostraca | -28.06 | 0.0209 | * |
|  | Thecostraca vs. Hexanauplia | 7.917 | 0.4739 | ns |
|  | Thecostraca vs. Malacostraca | -14.39 | 0.1512 | ns |
|  | Hexanauplia vs. Malacostraca | -22.31 | 0.0002 | *** |
| **Vasopressin-neurophysin** | Branchiopoda vs. Thecostraca | 13.75 | 0.0915 | ns |
|  | Branchiopoda vs. Hexanauplia | 13.75 | 0.0467 | * |
|  | Branchiopoda vs. Malacostraca | 10.34 | 0.1092 | ns |
|  | Thecostraca vs. Hexanauplia | 0.000 | >0.9999 | ns |
|  | Thecostraca vs. Malacostraca | -3.407 | 0.5227 | ns |
|  | Hexanauplia vs. Malacostraca | -3.407 | 0.2770 | ns |
|  |  |  |  |  |
|  |  |  |  |  |
| **Table S6 Cont’d** |  |  |  |  |
| **VPL** | Branchiopoda vs. Thecostraca | 0.000 | >0.9999 | ns |
|  | Branchiopoda vs. Hexanauplia | -27.65 | 0.0319 | * |
|  | Branchiopoda vs. Malacostraca | -20.55 | 0.0877 | ns |
|  | Thecostraca vs. Hexanauplia | -27.65 | 0.0116 | * |
|  | Thecostraca vs. Malacostraca | -20.55 | 0.0386 | * |
|  | Hexanauplia vs. Malacostraca | 7.103 | 0.2238 | ns |

*, **, ***, and **** indicate significant difference at p < 0.05, 0.01, 0.001, and 0.0001, respectively, whereas ns indicates insignificant. Statistical comparison for the neuropeptide family, CCAP, was not applicable. See Table S2 for the full names of all neuropeptide families.

**Table S7** Relative abundances of neuropeptide family member numbers for each family in malacostracan crustaceans classified into non-agonistic and agonistic group

| **Neuropeptide family** | **Non-agonistic/agonistic group of malacostracans** | **Relative abundance of neuropeptide family member number (mean ± SD)** | **Number of species** |
| --- | --- | --- | --- |
| **ACP** | Non-agonistic group | 0.01430 ± 0.02104 | 13 |
|  | Agonistic group | 0.01408 ± 0.01034 | 30 |
| **ADF** | Non-agonistic group | 0.000 ± 0.000 | 13 |
|  | Agonistic group | 0.0003922 ± 0.002148 | 30 |
| **Agatoxin-like peptide** | Non-agonistic group | 0.03350 ± 0.02117 | 13 |
|  | Agonistic group | 0.02864 ± 0.01870 | 30 |
| **AKH** | Non-agonistic group | 0.001202 ± 0.004334 | 13 |
|  | Agonistic group | 0.002988 ± 0.007744 | 30 |
| **AstA** | Non-agonistic group | 0.03139 ± 0.02845 | 13 |
|  | Agonistic group | 0.03976 ± 0.03133 | 30 |
| **AstB** | Non-agonistic group | 0.01866 ± 0.01536 | 13 |
|  | Agonistic group | 0.02571 ± 0.01699 | 30 |
| **AstC** | Non-agonistic group | 0.01317 ± 0.01469 | 13 |
|  | Agonistic group | 0.01561 ± 0.008696 | 30 |
| **AstCC** | Non-agonistic group | 0.01141 ± 0.01212 | 13 |
|  | Agonistic group | 0.01460 ± 0.01036 | 30 |
| **AstCCC** | Non-agonistic group | 0.01515 ± 0.009992 | 13 |
|  | Agonistic group | 0.01447 ± 0.007753 | 30 |
| **AT** | Non-agonistic group | 0.01277 ± 0.04223 | 13 |
|  | Agonistic group | 0.001730 ± 0.004574 | 30 |
| **Burs** | Non-agonistic group | 0.02850 ± 0.02227 | 13 |
|  | Agonistic group | 0.03260 ± 0.01810 | 30 |
| **Table S7 Cont’d** |  |  |  |
| **Cal** | Non-agonistic group | 0.03284 ± 0.02658 | 13 |
|  | Agonistic group | 0.02308 ± 0.01585 | 30 |
| **CAPA** | Non-agonistic group | 0.000 ± 0.000 | 13 |
|  | Agonistic group | 0.0008903 ± 0.003528 | 30 |
| **CCAP** | Non-agonistic group | 0.000 ± 0.000 | 13 |
|  | Agonistic group | 0.000 ± 0.000 | 30 |
| **CCHa** | Non-agonistic group | 0.01458 ± 0.01117 | 13 |
|  | Agonistic group | 0.02381 ± 0.01469 | 30 |
| **CCRFamide** | Non-agonistic group | 0.005667 ± 0.006767 | 13 |
|  | Agonistic group | 0.009030 ± 0.008183 | 30 |
| **CHH** | Non-agonistic group | 0.04032 ± 0.03497 | 13 |
|  | Agonistic group | 0.01909 ± 0.01789 | 30 |
| **CHH-MIH-like** | Non-agonistic group | 0.01048 ± 0.01158 | 13 |
|  | Agonistic group | 0.01713 ± 0.01447 | 30 |
| **CNMamide** | Non-agonistic group | 0.004733 ± 0.006489 | 13 |
|  | Agonistic group | 0.01573 ± 0.01134 | 30 |
| **CRF-like diuretic hormone** | Non-agonistic group | 0.009076 ± 0.007936 | 13 |
|  | Agonistic group | 0.01587 ± 0.008057 | 30 |
| **Crustacean female sex hormone** | Non-agonistic group | 0.02360 ± 0.02141 | 13 |
|  | Agonistic group | 0.03532 ± 0.02039 | 30 |
| **Crz** | Non-agonistic group | 0.01586 ± 0.01999 | 13 |
|  | Agonistic group | 0.01118 ± 0.006860 | 30 |
| **DH31** | Non-agonistic group | 0.01465 ± 0.009582 | 13 |
|  | Agonistic group | 0.01768 ± 0.01400 | 30 |
|  |  |  |  |
| **Table S7 Cont’d** |  |  |  |
| **DH44** | Non-agonistic group | 0.002259 ± 0.006939 | 13 |
|  | Agonistic group | 0.0006512 ± 0.002499 | 30 |
| **EFLamide** | Non-agonistic group | 0.02180 ± 0.01903 | 13 |
|  | Agonistic group | 0.02404 ± 0.01864 | 30 |
| **EH** | Non-agonistic group | 0.02778 ± 0.02275 | 13 |
|  | Agonistic group | 0.01833 ± 0.01529 | 30 |
| **Ele** | Non-agonistic group | 0.01426 ± 0.01630 | 13 |
|  | Agonistic group | 0.02003 ± 0.02046 | 30 |
| **Elongated pigment-dispersing hormone** | Non-agonistic group | 0.03219 ± 0.03886 | 13 |
|  | Agonistic group | 0.01179 ± 0.01068 | 30 |
| **ETH** | Non-agonistic group | 0.004679 ± 0.007492 | 13 |
|  | Agonistic group | 0.006690 ± 0.009202 | 30 |
| **FMRFa** | Non-agonistic group | 0.01189 ± 0.02687 | 13 |
|  | Agonistic group | 0.002134 ± 0.004973 | 30 |
| **Glycoprotein-A** | Non-agonistic group | 0.009879 ± 0.01067 | 13 |
|  | Agonistic group | 0.01366 ± 0.01273 | 30 |
| **Glycoprotein-B** | Non-agonistic group | 0.008763 ± 0.01156 | 13 |
|  | Agonistic group | 0.01087 ± 0.008909 | 30 |
| **GnRH** | Non-agonistic group | 0.002015 ± 0.007267 | 13 |
|  | Agonistic group | 0.0004219 ± 0.002311 | 30 |
| **GPA2** | Non-agonistic group | 0.001202 ± 0.004334 | 13 |
|  | Agonistic group | 0.005569 ± 0.02265 | 30 |
| **GPB5** | Non-agonistic group | 0.000 ± 0.000 | 13 |
|  | Agonistic group | 0.000 ± 0.000 | 30 |
|  |  |  |  |
| **Table S7 Cont’d** |  |  |  |
| **Hyrg** | Non-agonistic group | 0.01025 ± 0.01219 | 13 |
|  | Agonistic group | 0.01440 ± 0.009982 | 30 |
| **ILP** | Non-agonistic group | 0.000 ± 0.000 | 13 |
|  | Agonistic group | 0.0008972 ± 0.003443 | 30 |
| **ITP** | Non-agonistic group | 0.05573 ± 0.03040 | 13 |
|  | Agonistic group | 0.05673 ± 0.03125 | 30 |
| **K** | Non-agonistic group | 0.02343 ± 0.03706 | 13 |
|  | Agonistic group | 0.02750 ± 0.02250 | 30 |
| **Lst** | Non-agonistic group | 0.000 ± 0.000 | 13 |
|  | Agonistic group | 0.000 ± 0.000 | 30 |
| **Molt-inhibiting hormone** | Non-agonistic group | 0.006076 ± 0.007197 | 13 |
|  | Agonistic group | 0.01622 ± 0.01367 | 30 |
| **MS** | Non-agonistic group | 0.000 ± 0.000 | 13 |
|  | Agonistic group | 0.0003663 ± 0.002006 | 30 |
| **NP** | Non-agonistic group | 0.1442 ± 0.08231 | 13 |
|  | Agonistic group | 0.1110 ± 0.04845 | 30 |
| **NPF** | Non-agonistic group | 0.05098 ± 0.03031 | 13 |
|  | Agonistic group | 0.04097 ± 0.01845 | 30 |
| **NPLP** | Non-agonistic group | 0.000 ± 0.000 | 13 |
|  | Agonistic group | 0.0007631 ± 0.002907 | 30 |
| **NTL** | Non-agonistic group | 0.01105 ± 0.02323 | 13 |
|  | Agonistic group | 0.01857 ± 0.02725 | 30 |
| **OK** | Non-agonistic group | 0.02250 ± 0.01410 | 13 |
|  | Agonistic group | 0.03097 ± 0.02028 | 30 |
|  |  |  |  |
| **Table S7 Cont’d** |  |  |  |
| **PBAN** | Non-agonistic group | 0.004808 ± 0.01733 | 13 |
|  | Agonistic group | 0.001001 ± 0.004064 | 30 |
| **PBAN-DH** | Non-agonistic group | 0.001202 ± 0.004334 | 13 |
|  | Agonistic group | 0.0003205 ± 0.001756 | 30 |
| **Pburs** | Non-agonistic group | 0.001538 ± 0.004401 | 13 |
|  | Agonistic group | 0.0007354 ± 0.002873 | 30 |
| **PDF** | Non-agonistic group | 0.05443 ± 0.04230 | 13 |
|  | Agonistic group | 0.04076 ± 0.03011 | 30 |
| **Periviscerokinin** | Non-agonistic group | 0.003039 ± 0.005361 | 13 |
|  | Agonistic group | 0.01490 ± 0.01855 | 30 |
| **PK** | Non-agonistic group | 0.003839 ± 0.007961 | 13 |
|  | Agonistic group | 0.007142 ± 0.01078 | 30 |
| **Proc** | Non-agonistic group | 0.002367 ± 0.008534 | 13 |
|  | Agonistic group | 0.000 ± 0.000 | 30 |
| **PTTH** | Non-agonistic group | 0.0009050 ± 0.003263 | 13 |
|  | Agonistic group | 0.000 ± 0.000 | 30 |
| **Relaxin** | Non-agonistic group | 0.006748 ± 0.01005 | 13 |
|  | Agonistic group | 0.003728 ± 0.005974 | 30 |
| **RPCH** | Non-agonistic group | 0.01847 ± 0.01228 | 13 |
|  | Agonistic group | 0.01362 ± 0.009426 | 30 |
| **RYa** | Non-agonistic group | 0.000 ± 0.000 | 13 |
|  | Agonistic group | 0.003857 ± 0.01579 | 30 |
| **SIFa** | Non-agonistic group | 0.01193 ± 0.01077 | 13 |
|  | Agonistic group | 0.01470 ± 0.009456 | 30 |
|  |  |  |  |
| **Table S7 Cont’d** |  |  |  |
| **SK** | Non-agonistic group | 0.006176 ± 0.007700 | 13 |
|  | Agonistic group | 0.009856 ± 0.008157 | 30 |
| **sNPF** | Non-agonistic group | 0.01363 ± 0.01402 | 13 |
|  | Agonistic group | 0.01845 ± 0.009985 | 30 |
| **tPK** | Non-agonistic group | 0.0007849 ± 0.002830 | 13 |
|  | Agonistic group | 0.003942 ± 0.009300 | 30 |
| **Tris** | Non-agonistic group | 0.01147 ± 0.01379 | 13 |
|  | Agonistic group | 0.01409 ± 0.008116 | 30 |
| **TRP** | Non-agonistic group | 0.01973 ± 0.01685 | 13 |
|  | Agonistic group | 0.02325 ± 0.01614 | 30 |
| **Vasopressin-neurophysin** | Non-agonistic group | 0.004002 ± 0.009778 | 13 |
|  | Agonistic group | 0.002025 ± 0.006564 | 30 |
| **VPL** | Non-agonistic group | 0.02026 ± 0.03727 | 13 |
|  | Agonistic group | 0.01567 ± 0.01183 | 30 |

See Table S2 for the full names of all neuropeptide families and Table S4 for the basis behind the classification of the 43 malacostracans into non-agonistic and agonistic group.

**Table S8** Statistical comparisons of relative abundances of neuropeptide family member numbers for each family between non-agonistic and agonistic group of malacostracan crustaceans

| **Neuropeptide family** | **Diff. between medians of non-agonistic and agonistic groups** | **Mann-Whitney U value** | **P-value** | **Summary** |
| --- | --- | --- | --- | --- |
| ACP | 0.001481 | 168.5 | 0.4875 | ns |
| ADF | 0.000 | 188.5 | >0.9999 | ns |
| Agatoxin-like peptide | -0.0004304 | 173 | 0.5685 | ns |
| AKH | 0.000 | 178 | 0.5481 | ns |
| AstA | 0.008627 | 160 | 0.3626 | ns |
| AstB | 0.007428 | 150.5 | 0.2447 | ns |
| AstC | 0.004834 | 138.5 | 0.1370 | ns |
| AstCC | 0.004442 | 132.5 | 0.0990 | ns |
| AstCCC | -0.002139 | 183.5 | 0.7689 | ns |
| AT | 0.000 | 178 | 0.6064 | ns |
| Burs | 0.007969 | 166 | 0.4524 | ns |
| Cal | -0.009770 | 154.5 | 0.2908 | ns |
| CAPA | 0.000 | 182 | 0.5681 | ns |
| CCHa | 0.006735 | 127.5 | 0.0319 | * |
| CCRFamide | 0.01087 | 149 | 0.2116 | ns |
| CHH | -0.01151 | 114 | 0.0312 | * |
| CHH-MIH-like | 0.004699 | 146.5 | 0.1996 | ns |
| CNMamide | 0.01411 | 80.50 | 0.0015 | ** |
| CRF-like diuretic hormone | 0.005564 | 94 | 0.0065 | ** |
| Crustacean female sex hormone | 0.01271 | 119.5 | 0.0449 | * |
| Crz | 0.0005885 | 192.5 | 0.9529 | ns |
| DH31 | 0.0005107 | 178 | 0.6613 | ns |
| **Table S8 Cont’d** |  |  |  |  |
| DH44 | 0.000 | 178 | 0.4807 | ns |
| EFLamide | -0.005510 | 189 | 0.8805 | ns |
| EH | -0.006111 | 136.5 | 0.1244 | ns |
| Ele | 0.004093 | 148 | 0.2179 | ns |
| Elongated pigment-dispersing hormone | -0.01378 | 133.5 | 0.0968 | ns |
| ETH | 0.000 | 175.5 | 0.5619 | ns |
| FMRFa | 0.000 | 162.5 | 0.2624 | ns |
| Glycoprotein-A | 0.004611 | 139 | 0.1384 | ns |
| Glycoprotein-B | 0.01221 | 162.5 | 0.3857 | ns |
| GnRH | 0.000 | 186 | 0.7841 | ns |
| GPA2 | 0.000 | 190 | 0.7862 | ns |
| Hyrg | 0.003042 | 143 | 0.1685 | ns |
| ILP | 0.000 | 182 | 0.5681 | ns |
| ITP | 0.0007508 | 190 | 0.9013 | ns |
| K | 0.02487 | 143.5 | 0.1727 | ns |
| Molt-inhibiting hormone | 0.01430 | 100.5 | 0.0100 | ** |
| MS | 0.000 | 188.5 | >0.9999 | ns |
| NP | -0.03527 | 152 | 0.2648 | ns |
| NPF | 0.002834 | 168 | 0.4841 | ns |
| NPLP | 0.000 | 182 | 0.5681 | ns |
| NTL | 0.01140 | 152 | 0.2227 | ns |
| OK | 0.006205 | 157.5 | 0.3288 | ns |
| PBAN | 0.000 | 192 | 0.6945 | ns |
| PBAN-DH | 0.000 | 186 | 0.7841 | ns |
| Pburs | 0.000 | 178 | 0.4807 | ns |
| **Table S8 Cont’d** |  |  |  |  |
| PDF | 0.004485 | 170.5 | 0.5260 | ns |
| Periviscerokinin | 0.01171 | 87.50 | 0.0027 | ** |
| PK | 0.000 | 164 | 0.3285 | ns |
| Proc | 0.000 | 180 | 0.3023 | ns |
| PTTH | 0.000 | 180 | 0.3023 | ns |
| Relaxin | 0.000 | 170.5 | 0.4508 | ns |
| RPCH | -0.002395 | 152 | 0.2615 | ns |
| RYa | 0.000 | 182 | 0.5681 | ns |
| SIFa | 0.001224 | 164 | 0.4204 | ns |
| SK | 0.01087 | 142 | 0.1537 | ns |
| sNPF | 0.003274 | 131.5 | 0.0944 | ns |
| tPK | 0.000 | 169 | 0.2407 | ns |
| Tris | 0.003219 | 137 | 0.1260 | ns |
| TRP | 0.0001240 | 167.5 | 0.4760 | ns |
| Vasopressin-neurophysin | 0.000 | 182.5 | 0.4407 | ns |
| VPL | 0.004876 | 127 | 0.0705 | ns |

* and ** indicate significant difference at p < 0.05 and 0.01, respectively, whereas ns indicates insignificant. Statistical comparison for the three neuropeptide families, including CCAP, GPB5, and Lst, was not applicable. See Table S2 for the full names of all neuropeptide families.

**Table S9** Relative abundances of neuropeptide family member numbers for each family among the three sensory and neuroendocrine organs of crustaceans

| **Neuropeptide family** | **Organ** | **Relative abundance of neuropeptide family member number (mean ± SD)** | **Number of species** |
| --- | --- | --- | --- |
| **ACP** | Antennae + Antennules | 0.01055 ± 0.01905 | 22a |
|  | Central nervous system | 0.01649 ± 0.01030 | 23 |
|  | Eyestalks | 0.01770 ± 0.008037 | 23 |
| **ADF** | Antennae + Antennules | 0.001166 ± 0.005467 | 22 |
|  | Central nervous system | 0.0005647 ± 0.002708 | 23 |
|  | Eyestalks | 0.000 ± 0.000 | 23 |
| **Agatoxin-like peptide** | Antennae + Antennules | 0.05528 ± 0.04223 | 22 |
|  | Central nervous system | 0.03611 ± 0.02174 | 23 |
|  | Eyestalks | 0.03849 ± 0.02201 | 23 |
| **AKH** | Antennae + Antennules | 0.002525 ± 0.008173 | 22 |
|  | Central nervous system | 0.0005647 ± 0.002708 | 23 |
|  | Eyestalks | 0.000 ± 0.000 | 23 |
| **AstA** | Antennae + Antennules | 0.02148 ± 0.03267 | 22 |
|  | Central nervous system | 0.04276 ± 0.03032 | 23 |
|  | Eyestalks | 0.04326 ± 0.02955 | 23 |
| **AstB** | Antennae + Antennules | 0.03149 ± 0.02416 | 22 |
|  | Central nervous system | 0.02966 ± 0.01905 | 23 |
|  | Eyestalks | 0.02145 ± 0.01545 | 23 |
| **AstC** | Antennae + Antennules | 0.007600 ± 0.01472 | 22 |
|  | Central nervous system | 0.01863 ± 0.005871 | 23 |
|  | Eyestalks | 0.01954 ± 0.008405 | 23 |
|  |  |  |  |
|  |  |  |  |
| **Table S9 Cont’d** |  |  |  |
| **AstCC** | Antennae + Antennules | 0.001684 ± 0.007896 | 22 |
|  | Central nervous system | 0.02041 ± 0.01035 | 23 |
|  | Eyestalks | 0.01373 ± 0.007756 | 23 |
| **AstCCC** | Antennae + Antennules | 0.02198 ± 0.02153 | 22 |
|  | Central nervous system | 0.01712 ± 0.007790 | 23 |
|  | Eyestalks | 0.01694 ± 0.005755 | 23 |
| **AT** | Antennae + Antennules | 0.002709 ± 0.009317 | 22 |
|  | Central nervous system | 0.001876 ± 0.006242 | 23 |
|  | Eyestalks | 0.000 ± 0.000 | 23 |
| **Burs** | Antennae + Antennules | 0.03436 ± 0.04007 | 22 |
|  | Central nervous system | 0.04355 ± 0.01770 | 23 |
|  | Eyestalks | 0.01986 ± 0.01841 | 23 |
| **Cal** | Antennae + Antennules | 0.01123 ± 0.01918 | 22 |
|  | Central nervous system | 0.02165 ± 0.01316 | 23 |
|  | Eyestalks | 0.01891 ± 0.01225 | 23 |
| **CAPA** | Antennae + Antennules | 0.0008913 ± 0.004180 | 22 |
|  | Central nervous system | 0.001076 ± 0.003570 | 23 |
|  | Eyestalks | 0.000 ± 0.000 | 23 |
| **CCAP** | Antennae + Antennules | 0.000 ± 0.000 | 22 |
|  | Central nervous system | 0.000 ± 0.000 | 23 |
|  | Eyestalks | 0.000 ± 0.000 | 23 |
| **CCHa** | Antennae + Antennules | 0.03766 ± 0.02532 | 22 |
|  | Central nervous system | 0.03529 ± 0.01338 | 23 |
|  | Eyestalks | 0.03335 ± 0.01356 | 23 |
|  |  |  |  |
|  |  |  |  |
| **Table S9 Cont’d** |  |  |  |
| **CCRFamide** | Antennae + Antennules | 0.007580 ± 0.01448 | 22 |
|  | Central nervous system | 0.01183 ± 0.009470 | 23 |
|  | Eyestalks | 0.005715 ± 0.007423 | 23 |
| **CHH** | Antennae + Antennules | 0.02710 ± 0.02977 | 22 |
|  | Central nervous system | 0.02008 ± 0.02400 | 23 |
|  | Eyestalks | 0.02270 ± 0.02194 | 23 |
| **CHH-MIH-like** | Antennae + Antennules | 0.005040 ± 0.01412 | 22 |
|  | Central nervous system | 0.008300 ± 0.01778 | 23 |
|  | Eyestalks | 0.01671 ± 0.01156 | 23 |
| **CNMamide** | Antennae + Antennules | 0.002632 ± 0.008579 | 22 |
|  | Central nervous system | 0.01167 ± 0.01061 | 23 |
|  | Eyestalks | 0.01513 ± 0.01051 | 23 |
| **CRF-like diuretic hormone** | Antennae + Antennules | 0.03106 ± 0.01837 | 22 |
|  | Central nervous system | 0.02147 ± 0.009482 | 23 |
|  | Eyestalks | 0.01767 ± 0.004901 | 23 |
| **Crustacean female sex hormone** | Antennae + Antennules | 0.006552 ± 0.01491 | 22 |
|  | Central nervous system | 0.01499 ± 0.01936 | 23 |
|  | Eyestalks | 0.04378 ± 0.02015 | 23 |
| **Crz** | Antennae + Antennules | 0.003660 ± 0.01189 | 22 |
|  | Central nervous system | 0.01121 ± 0.01106 | 23 |
|  | Eyestalks | 0.01346 ± 0.006763 | 23 |
| **DH31** | Antennae + Antennules | 0.02327 ± 0.01970 | 22 |
|  | Central nervous system | 0.02183 ± 0.007734 | 23 |
|  | Eyestalks | 0.01963 ± 0.007565 | 23 |
|  |  |  |  |
|  |  |  |  |
| **Table S9 Cont’d** |  |  |  |
| **DH44** | Antennae + Antennules | 0.000 ± 0.000 | 22 |
|  | Central nervous system | 0.0008525 ± 0.004089 | 23 |
|  | Eyestalks | 0.001596 ± 0.005416 | 23 |
| **EFLamide** | Antennae + Antennules | 0.01239 ± 0.01948 | 22 |
|  | Central nervous system | 0.02358 ± 0.01285 | 23 |
|  | Eyestalks | 0.02142 ± 0.01285 | 23 |
| **EH** | Antennae + Antennules | 0.01513 ± 0.01805 | 22 |
|  | Central nervous system | 0.01581 ± 0.009412 | 23 |
|  | Eyestalks | 0.01642 ± 0.007582 | 23 |
| **Ele** | Antennae + Antennules | 0.004176 ± 0.01096 | 22 |
|  | Central nervous system | 0.01673 ± 0.01029 | 23 |
|  | Eyestalks | 0.01566 ± 0.01195 | 23 |
| **Elongated pigment-dispersing hormone** | Antennae + Antennules | 0.001748 ± 0.008200 | 22 |
|  | Central nervous system | 0.01313 ± 0.01119 | 23 |
|  | Eyestalks | 0.004848 ± 0.007815 | 23 |
| **ETH** | Antennae + Antennules | 0.01123 ± 0.01566 | 22 |
|  | Central nervous system | 0.009310 ± 0.01353 | 23 |
|  | Eyestalks | 0.005320 ± 0.007548 | 23 |
| **FMRFa** | Antennae + Antennules | 0.001263 ± 0.005922 | 22 |
|  | Central nervous system | 0.003134 ± 0.007110 | 23 |
|  | Eyestalks | 0.0005435 ± 0.002606 | 23 |
| **Glycoprotein-A** | Antennae + Antennules | 0.01224 ± 0.01724 | 22 |
|  | Central nervous system | 0.01289 ± 0.009345 | 23 |
|  | Eyestalks | 0.01377 ± 0.01159 | 23 |
|  |  |  |  |
|  |  |  |  |
| **Table S9 Cont’d** |  |  |  |
| **Glycoprotein-B** | Antennae + Antennules | 0.02649 ± 0.02447 | 22 |
|  | Central nervous system | 0.01750 ± 0.01076 | 23 |
|  | Eyestalks | 0.01704 ± 0.004271 | 23 |
| **GnRH** | Antennae + Antennules | 0.000 ± 0.000 | 22 |
|  | Central nervous system | 0.000 ± 0.000 | 23 |
|  | Eyestalks | 0.000 ± 0.000 | 23 |
| **GPA2** | Antennae + Antennules | 0.000 ± 0.000 | 22 |
|  | Central nervous system | 0.0009058 ± 0.004344 | 23 |
|  | Eyestalks | 0.000 ± 0.000 | 23 |
| **GPB5** | Antennae + Antennules | 0.000 ± 0.000 | 22 |
|  | Central nervous system | 0.000 ± 0.000 | 23 |
|  | Eyestalks | 0.000 ± 0.000 | 23 |
| **Hyrg** | Antennae + Antennules | 0.01765 ± 0.02248 | 22 |
|  | Central nervous system | 0.009362 ± 0.009561 | 23 |
|  | Eyestalks | 0.01800 ± 0.01144 | 23 |
| **ILP** | Antennae + Antennules | 0.000 ± 0.000 | 22 |
|  | Central nervous system | 0.001060 ± 0.005086 | 23 |
|  | Eyestalks | 0.0007246 ± 0.003475 | 23 |
| **ITP** | Antennae + Antennules | 0.09124 ± 0.04360 | 22 |
|  | Central nervous system | 0.04614 ± 0.02631 | 23 |
|  | Eyestalks | 0.05345 ± 0.03812 | 23 |
| **K** | Antennae + Antennules | 0.004048 ± 0.01098 | 22 |
|  | Central nervous system | 0.02633 ± 0.02082 | 23 |
|  | Eyestalks | 0.03731 ± 0.02473 | 23 |
|  |  |  |  |
|  |  |  |  |
| **Table S9 Cont’d** |  |  |  |
| **Lst** | Antennae + Antennules | 0.000 ± 0.000 | 22 |
|  | Central nervous system | 0.000 ± 0.000 | 23 |
|  | Eyestalks | 0.000 ± 0.000 | 23 |
| **Molt-inhibiting hormone** | Antennae + Antennules | 0.01223 ± 0.01737 | 22 |
|  | Central nervous system | 0.004804 ± 0.008855 | 23 |
|  | Eyestalks | 0.01593 ± 0.01479 | 23 |
| **MS** | Antennae + Antennules | 0.000 ± 0.000 | 22 |
|  | Central nervous system | 0.000 ± 0.000 | 23 |
|  | Eyestalks | 0.000 ± 0.000 | 23 |
| **NP** | Antennae + Antennules | 0.1732 ± 0.1048 | 22 |
|  | Central nervous system | 0.09363 ± 0.03888 | 23 |
|  | Eyestalks | 0.08803 ± 0.04048 | 23 |
| **NPF** | Antennae + Antennules | 0.01990 ± 0.02867 | 22 |
|  | Central nervous system | 0.05514 ± 0.02106 | 23 |
|  | Eyestalks | 0.05269 ± 0.01611 | 23 |
| **NPLP** | Antennae + Antennules | 0.001299 ± 0.006091 | 22 |
|  | Central nervous system | 0.000 ± 0.000 | 23 |
|  | Eyestalks | 0.000 ± 0.000 | 23 |
| **NTL** | Antennae + Antennules | 0.01670 ± 0.03523 | 22 |
|  | Central nervous system | 0.01843 ± 0.02384 | 23 |
|  | Eyestalks | 0.01710 ± 0.02417 | 23 |
| **OK** | Antennae + Antennules | 0.06130 ± 0.02907 | 22 |
|  | Central nervous system | 0.03861 ± 0.02069 | 23 |
|  | Eyestalks | 0.02819 ± 0.01166 | 23 |
|  |  |  |  |
|  |  |  |  |
| **Table S9 Cont’d** |  |  |  |
| **PBAN** | Antennae + Antennules | 0.000 ± 0.000 | 22 |
|  | Central nervous system | 0.0008525 ± 0.004089 | 23 |
|  | Eyestalks | 0.0006301 ± 0.003022 | 23 |
| **PBAN-DH** | Antennae + Antennules | 0.001263 ± 0.005922 | 22 |
|  | Central nervous system | 0.000 ± 0.000 | 23 |
|  | Eyestalks | 0.0007628 ± 0.003658 | 23 |
| **Pburs** | Antennae + Antennules | 0.000 ± 0.000 | 22 |
|  | Central nervous system | 0.0007764 ± 0.003723 | 23 |
|  | Eyestalks | 0.0004831 ± 0.002317 | 23 |
| **PDF** | Antennae + Antennules | 0.02452 ± 0.02523 | 22 |
|  | Central nervous system | 0.02651 ± 0.01691 | 23 |
|  | Eyestalks | 0.04949 ± 0.03079 | 23 |
| **Periviscerokinin** | Antennae + Antennules | 0.004690 ± 0.01523 | 22 |
|  | Central nervous system | 0.01696 ± 0.01547 | 23 |
|  | Eyestalks | 0.006087 ± 0.01025 | 23 |
| **PK** | Antennae + Antennules | 0.001894 ± 0.008883 | 22 |
|  | Central nervous system | 0.008633 ± 0.01265 | 23 |
|  | Eyestalks | 0.01033 ± 0.01236 | 23 |
| **Proc** | Antennae + Antennules | 0.000 ± 0.000 | 22 |
|  | Central nervous system | 0.000 ± 0.000 | 23 |
|  | Eyestalks | 0.000 ± 0.000 | 23 |
| **PTTH** | Antennae + Antennules | 0.000 ± 0.000 | 22 |
|  | Central nervous system | 0.000 ± 0.000 | 23 |
|  | Eyestalks | 0.0006211 ± 0.002979 | 23 |
|  |  |  |  |
|  |  |  |  |
| **Table S9 Cont’d** |  |  |  |
| **Relaxin** | Antennae + Antennules | 0.003577 ± 0.01160 | 22 |
|  | Central nervous system | 0.007898 ± 0.01068 | 23 |
|  | Eyestalks | 0.005261 ± 0.007542 | 23 |
| **RPCH** | Antennae + Antennules | 0.004618 ± 0.01014 | 22 |
|  | Central nervous system | 0.01365 ± 0.007992 | 23 |
|  | Eyestalks | 0.01576 ± 0.007198 | 23 |
| **RYa** | Antennae + Antennules | 0.000 ± 0.000 | 22 |
|  | Central nervous system | 0.000 ± 0.000 | 23 |
|  | Eyestalks | 0.000 ± 0.000 | 23 |
| **SIFa** | Antennae + Antennules | 0.01627 ± 0.02041 | 22 |
|  | Central nervous system | 0.01834 ± 0.008446 | 23 |
|  | Eyestalks | 0.01549 ± 0.007834 | 23 |
| **SK** | Antennae + Antennules | 0.007650 ± 0.01697 | 22 |
|  | Central nervous system | 0.01320 ± 0.01022 | 23 |
|  | Eyestalks | 0.01267 ± 0.007313 | 23 |
| **sNPF** | Antennae + Antennules | 0.03550 ± 0.02205 | 22 |
|  | Central nervous system | 0.02165 ± 0.006860 | 23 |
|  | Eyestalks | 0.02042 ± 0.008723 | 23 |
| **tPK** | Antennae + Antennules | 0.000 ± 0.000 | 22 |
|  | Central nervous system | 0.0005647 ± 0.002708 | 23 |
|  | Eyestalks | 0.0007246 ± 0.003475 | 23 |
| **Tris** | Antennae + Antennules | 0.009934 ± 0.02007 | 22 |
|  | Central nervous system | 0.01325 ± 0.008571 | 23 |
|  | Eyestalks | 0.01830 ± 0.005660 | 23 |
|  |  |  |  |
|  |  |  |  |
| **Table S9 Cont’d** |  |  |  |
| **TRP** | Antennae + Antennules | 0.04028 ± 0.01852 | 22 |
|  | Central nervous system | 0.02565 ± 0.01296 | 23 |
|  | Eyestalks | 0.02127 ± 0.008532 | 23 |
| **Vasopressin-neurophysin** | Antennae + Antennules | 0.000 ± 0.000 | 22 |
|  | Central nervous system | 0.001449 ± 0.00695 | 23 |
|  | Eyestalks | 0.000 ± 0.000 | 23 |
| **VPL** | Antennae + Antennules | 0.02006 ± 0.03142 | 22 |
|  | Central nervous system | 0.01615 ± 0.01212 | 23 |
|  | Eyestalks | 0.01566 ± 0.009742 | 23 |

aAntennae + Antennules of only 22 newly collected crustacean species were RNA-sequenced in this study due to the insufficient RNA concentration for this organ in the *Paraleptuca splendida* sample. See Table S2 for the full names of all neuropeptide families.

**Table S10** Statistical comparisons of relative abundances of neuropeptide family member numbers for each family among the three crustacean sensory and neuroendocrine organs

| **Neuropeptide family** | **Pairwise comparison**a | **Mean rank diff.** | **P-value** | **Summary** |
| --- | --- | --- | --- | --- |
| **ACP** | AA vs. CNS | -12.74 | 0.0275 | * |
|  | AA vs. ES | -12.66 | 0.0285 | * |
|  | CNS vs. ES | 0.08696 | 0.9879 | ns |
| **ADF** | AA vs. CNS | 0.1117 | 0.9484 | ns |
|  | AA vs. ES | 1.568 | 0.3636 | ns |
|  | CNS vs. ES | 1.457 | 0.3934 | ns |
| **Agatoxin-like peptide** | AA vs. CNS | 10.27 | 0.0808 | ns |
|  | AA vs. ES | 10.77 | 0.0671 | ns |
|  | CNS vs. ES | 0.5000 | 0.9315 | ns |
| **AKH** | AA vs. CNS | 1.702 | 0.4174 | ns |
|  | AA vs. ES | 3.136 | 0.1350 | ns |
|  | CNS vs. ES | 1.435 | 0.4892 | ns |
| **AstA** | AA vs. CNS | -16.60 | 0.0047 | ** |
|  | AA vs. ES | -16.53 | 0.0049 | ** |
|  | CNS vs. ES | 0.06522 | 0.9910 | ns |
| **AstB** | AA vs. CNS | 1.335 | 0.8205 | ns |
|  | AA vs. ES | 11.10 | 0.0593 | ns |
|  | CNS vs. ES | 9.761 | 0.0934 | ns |
| **AstC** | AA vs. CNS | -18.89 | 0.0012 | ** |
|  | AA vs. ES | -17.93 | 0.0021 | ** |
|  | CNS vs. ES | 0.9565 | 0.8682 | ns |
|  |  |  |  |  |
| **Table S10 Cont’d** |  |  |  |  |
| **AstCC** | AA vs. CNS | -33.35 | <0.0001 | **** |
|  | AA vs. ES | -21.68 | 0.0002 | *** |
|  | CNS vs. ES | 11.67 | 0.0393 | * |
| **AstCCC** | AA vs. CNS | 4.323 | 0.4617 | ns |
|  | AA vs. ES | 8.780 | 0.1349 | ns |
|  | CNS vs. ES | 4.457 | 0.4428 | ns |
| **AT** | AA vs. CNS | 0.1789 | 0.9407 | ns |
|  | AA vs. ES | 3.114 | 0.1954 | ns |
|  | CNS vs. ES | 2.935 | 0.2171 | ns |
| **Burs** | AA vs. CNS | -10.20 | 0.0807 | ns |
|  | AA vs. ES | 9.798 | 0.0935 | ns |
|  | CNS vs. ES | 20.00 | 0.0005 | *** |
| **Cal** | AA vs. CNS | -15.20 | 0.0086 | ** |
|  | AA vs. ES | -11.61 | 0.0446 | * |
|  | CNS vs. ES | 3.587 | 0.5304 | ns |
| **CAPA** | AA vs. CNS | -1.322 | 0.5286 | ns |
|  | AA vs. ES | 1.591 | 0.4483 | ns |
|  | CNS vs. ES | 2.913 | 0.1603 | ns |
| **CCHa** | AA vs. CNS | 2.185 | 0.7109 | ns |
|  | AA vs. ES | 4.467 | 0.4484 | ns |
|  | CNS vs. ES | 2.283 | 0.6953 | ns |
| **CCRFamide** | AA vs. CNS | -11.68 | 0.0279 | * |
|  | AA vs. ES | -0.4170 | 0.9374 | ns |
|  | CNS vs. ES | 11.26 | 0.0320 | * |
| **Table S10 Cont’d** |  |  |  |  |
| **CHH** | AA vs. CNS | 4.634 | 0.4169 | ns |
|  | AA vs. ES | 1.547 | 0.7864 | ns |
|  | CNS vs. ES | -3.087 | 0.5845 | ns |
| **CHH-MIH-like** | AA vs. CNS | -3.621 | 0.4914 | ns |
|  | AA vs. ES | -20.84 | <0.0001 | **** |
|  | CNS vs. ES | -17.22 | 0.0009 | *** |
| **CNMamide** | AA vs. CNS | -16.60 | 0.0026 | ** |
|  | AA vs. ES | -21.30 | 0.0001 | *** |
|  | CNS vs. ES | -4.696 | 0.3893 | ns |
| **CRF-like diuretic hormone** | AA vs. CNS | 13.68 | 0.0202 | * |
|  | AA vs. ES | 22.40 | 0.0001 | *** |
|  | CNS vs. ES | 8.717 | 0.1347 | ns |
| **Crustacean female sex hormone** | AA vs. CNS | -7.725 | 0.1685 | ns |
|  | AA vs. ES | -29.77 | <0.0001 | **** |
|  | CNS vs. ES | -22.04 | <0.0001 | **** |
| **Crz** | AA vs. CNS | -16.43 | 0.0029 | ** |
|  | AA vs. ES | -20.39 | 0.0002 | *** |
|  | CNS vs. ES | -3.957 | 0.4681 | ns |
| **DH31** | AA vs. CNS | 1.952 | 0.7404 | ns |
|  | AA vs. ES | 8.060 | 0.1712 | ns |
|  | CNS vs. ES | 6.109 | 0.2943 | ns |
| **DH44** | AA vs. CNS | -1.478 | 0.4811 | ns |
|  | AA vs. ES | -2.957 | 0.1588 | ns |
|  | CNS vs. ES | -1.478 | 0.4762 | ns |
| **Table S10 Cont’d** |  |  |  |  |
| **EFLamide** | AA vs. CNS | -16.90 | 0.0039 | ** |
|  | AA vs. ES | -11.66 | 0.0462 | * |
|  | CNS vs. ES | 5.239 | 0.3650 | ns |
| **EH** | AA vs. CNS | -3.014 | 0.6058 | ns |
|  | AA vs. ES | -2.362 | 0.6859 | ns |
|  | CNS vs. ES | 0.6522 | 0.9101 | ns |
| **Ele** | AA vs. CNS | -22.62 | <0.0001 | **** |
|  | AA vs. ES | -17.97 | 0.0016 | ** |
|  | CNS vs. ES | 4.652 | 0.4098 | ns |
| **Elongated pigment-dispersing hormone** | AA vs. CNS | -19.93 | <0.0001 | **** |
|  | AA vs. ES | -6.608 | 0.1775 | ns |
|  | CNS vs. ES | 13.33 | 0.0060 | ** |
| **ETH** | AA vs. CNS | 1.196 | 0.8145 | ns |
|  | AA vs. ES | 4.717 | 0.3547 | ns |
|  | CNS vs. ES | 3.522 | 0.4847 | ns |
| **FMRFa** | AA vs. CNS | -4.254 | 0.1426 | ns |
|  | AA vs. ES | 0.2895 | 0.9205 | ns |
|  | CNS vs. ES | 4.543 | 0.1133 | ns |
| **Glycoprotein-A** | AA vs. CNS | -2.855 | 0.6141 | ns |
|  | AA vs. ES | -3.529 | 0.5331 | ns |
|  | CNS vs. ES | -0.6739 | 0.9042 | ns |
| **Glycoprotein-B** | AA vs. CNS | 6.634 | 0.2591 | ns |
|  | AA vs. ES | 9.895 | 0.0923 | ns |
|  | CNS vs. ES | 3.261 | 0.5748 | ns |
| **Table S10 Cont’d** |  |  |  |  |
| **GPA2** | AA vs. CNS | -1.478 | 0.2293 | ns |
|  | AA vs. ES | 0.000 | >0.9999 | ns |
|  | CNS vs. ES | 1.478 | 0.2240 | ns |
| **Hyrg** | AA vs. CNS | 5.932 | 0.3004 | ns |
|  | AA vs. ES | -4.655 | 0.4164 | ns |
|  | CNS vs. ES | -10.59 | 0.0616 | ns |
| **ILP** | AA vs. CNS | -1.500 | 0.3848 | ns |
|  | AA vs. ES | -1.457 | 0.3988 | ns |
|  | CNS vs. ES | 0.04348 | 0.9797 | ns |
| **ITP** | AA vs. CNS | 19.33 | 0.0010 | ** |
|  | AA vs. ES | 17.63 | 0.0028 | ** |
|  | CNS vs. ES | -1.696 | 0.7712 | ns |
| **K** | AA vs. CNS | -21.72 | 0.0002 | *** |
|  | AA vs. ES | -28.74 | <0.0001 | **** |
|  | CNS vs. ES | -7.022 | 0.2167 | ns |
| **Molt-inhibiting hormone** | AA vs. CNS | 8.017 | 0.1346 | ns |
|  | AA vs. ES | -6.875 | 0.1995 | ns |
|  | CNS vs. ES | -14.89 | 0.0049 | ** |
| **NP** | AA vs. CNS | 16.01 | 0.0066 | ** |
|  | AA vs. ES | 17.45 | 0.0031 | ** |
|  | CNS vs. ES | 1.435 | 0.8056 | ns |
| **NPF** | AA vs. CNS | -24.88 | <0.0001 | **** |
|  | AA vs. ES | -21.95 | 0.0002 | *** |
|  | CNS vs. ES | 2.935 | 0.6131 | ns |
| **Table S10 Cont’d** |  |  |  |  |
| **NPLP** | AA vs. CNS | 1.545 | 0.2088 | ns |
|  | AA vs. ES | 1.545 | 0.2088 | ns |
|  | CNS vs. ES | 0.000 | >0.9999 | ns |
| **NTL** | AA vs. CNS | -7.753 | 0.1444 | ns |
|  | AA vs. ES | -6.492 | 0.2216 | ns |
|  | CNS vs. ES | 1.261 | 0.8103 | ns |
| **OK** | AA vs. CNS | 17.25 | 0.0034 | ** |
|  | AA vs. ES | 27.57 | <0.0001 | **** |
|  | CNS vs. ES | 10.33 | 0.0765 | ns |
| **PBAN** | AA vs. CNS | -1.500 | 0.3848 | ns |
|  | AA vs. ES | -1.457 | 0.3988 | ns |
|  | CNS vs. ES | 0.04348 | 0.9797 | ns |
| **PBAN-DH** | AA vs. CNS | 1.568 | 0.3636 | ns |
|  | AA vs. ES | 0.1117 | 0.9484 | ns |
|  | CNS vs. ES | -1.457 | 0.3934 | ns |
| **Pburs** | AA vs. CNS | -1.500 | 0.3848 | ns |
|  | AA vs. ES | -1.457 | 0.3988 | ns |
|  | CNS vs. ES | 0.04348 | 0.9797 | ns |
| **PDF** | AA vs. CNS | -1.011 | 0.8636 | ns |
|  | AA vs. ES | -17.47 | 0.0030 | ** |
|  | CNS vs. ES | -16.46 | 0.0047 | ** |
| **Periviscerokinin** | AA vs. CNS | -22.06 | <0.0001 | **** |
|  | AA vs. ES | -5.625 | 0.2803 | ns |
|  | CNS vs. ES | 16.43 | 0.0014 | ** |
| **Table S10 Cont’d** |  |  |  |  |
| **PK** | AA vs. CNS | -10.37 | 0.0290 | * |
|  | AA vs. ES | -13.35 | 0.0049 | ** |
|  | CNS vs. ES | -2.978 | 0.5259 | ns |
| **PTTH** | AA vs. CNS | 0.000 | >0.9999 | ns |
|  | AA vs. ES | -1.478 | 0.2293 | ns |
|  | CNS vs. ES | -1.478 | 0.2240 | ns |
| **Relaxin** | AA vs. CNS | -10.85 | 0.0223 | * |
|  | AA vs. ES | -7.289 | 0.1248 | ns |
|  | CNS vs. ES | 3.565 | 0.4476 | ns |
| **RPCH** | AA vs. CNS | -17.29 | 0.0026 | ** |
|  | AA vs. ES | -18.99 | 0.0010 | *** |
|  | CNS vs. ES | -1.696 | 0.7654 | ns |
| **SIFa** | AA vs. CNS | -6.401 | 0.2737 | ns |
|  | AA vs. ES | -0.1838 | 0.9749 | ns |
|  | CNS vs. ES | 6.217 | 0.2823 | ns |
| **SK** | AA vs. CNS | -14.73 | 0.0090 | ** |
|  | AA vs. ES | -14.03 | 0.0128 | * |
|  | CNS vs. ES | 0.6957 | 0.9007 | ns |
| **sNPF** | AA vs. CNS | 18.61 | 0.0016 | ** |
|  | AA vs. ES | 24.06 | <0.0001 | **** |
|  | CNS vs. ES | 5.457 | 0.3491 | ns |
| **tPK** | AA vs. CNS | -1.457 | 0.3988 | ns |
|  | AA vs. ES | -1.500 | 0.3848 | ns |
|  | CNS vs. ES | -0.04348 | 0.9797 | ns |
| **Table S10 Cont’d** |  |  |  |  |
| **Tris** | AA vs. CNS | -12.01 | 0.0377 | * |
|  | AA vs. ES | -18.49 | 0.0014 | ** |
|  | CNS vs. ES | -6.478 | 0.2570 | ns |
| **TRP** | AA vs. CNS | 18.25 | 0.0020 | ** |
|  | AA vs. ES | 25.16 | <0.0001 | **** |
|  | CNS vs. ES | 6.913 | 0.2356 | ns |
| **Vasopressin-neurophysin** | AA vs. CNS | -1.478 | 0.2293 | ns |
|  | AA vs. ES | 0.000 | >0.9999 | ns |
|  | CNS vs. ES | 1.478 | 0.2240 | ns |
| **VPL** | AA vs. CNS | -5.006 | 0.3864 | ns |
|  | AA vs. ES | -2.789 | 0.6295 | ns |
|  | CNS vs. ES | 2.217 | 0.6980 | ns |

a: AA = Antennae + Antennules,CNS = Central nervous system, ES = Eyestalks. *, **, ***, and **** indicate significant difference at p < 0.05, 0.01, 0.001, and 0.0001, respectively, whereas ns indicates insignificant. Statistical comparison for the seven neuropeptide families, including CCAP, GnRH, GPB5, Lst, MS, Proc, and RYa, was not applicable. See Table S2 for the full names of all neuropeptide families.
